# Supplementary material for: Towards hydrogen-rich ionic (NH4)(BH3NH2BH2NH2BH3) and related molecular NH3BH2NH2BH2NH2BH3
Source: Royal Society of Chemistry journal article supplement (doi:10.1039/d2dt03674f), 2023-01-01
Supplement: d2dt03674f1.pdf [file d2dt03674f1.pdf]

## ELECTRONIC SUPPLEMENTARY INFORMATION

### “Towards hydrogen-rich ionic $(\text{NH}_4)(\text{BH}_3\text{NH}_2\text{BH}_2\text{NH}_2\text{BH}_3)$ and related molecular $\text{NH}_3\text{BH}_2\text{NH}_2\text{BH}_2\text{NH}_2\text{BH}_3$ ”

R. Owarzany, T. Jaroń, K. Kazimierzczuk, P. J. Malinowski, W. Grochala, K. J. Fijalkowski

#### Contents:

1. Records of reports on novel amidoborane and  $\text{M}(\text{B}_3\text{N}_2)$  salts and related compounds:
2. Synthesis of  $\text{M}(\text{B}_3\text{N}_2)$  salts of the products obtained:  
 $(\text{NH}_4)(\text{B}_3\text{N}_2) \cdot 3(\text{B}_3\text{N}_3)$  Li( $\text{B}_3\text{N}_2$ ) Na( $\text{B}_3\text{N}_2$ ) K( $\text{B}_3\text{N}_2$ ) Rb( $\text{B}_3\text{N}_2$ ) Cs( $\text{B}_3\text{N}_2$ )  $\text{NH}_3\text{BH}_3$
3. Table of  $^{11}\text{B}$  NMR @ THF- $d_8$  chemical shifts of  $\text{M}(\text{B}_3\text{N}_2)$  salts and ammonia borane:  
 $(\text{NH}_4)(\text{B}_3\text{N}_2) \cdot 3(\text{B}_3\text{N}_3)$  Li( $\text{B}_3\text{N}_2$ ) Na( $\text{B}_3\text{N}_2$ ) K( $\text{B}_3\text{N}_2$ ) Rb( $\text{B}_3\text{N}_2$ ) Cs( $\text{B}_3\text{N}_2$ )  $\text{NH}_3\text{BH}_3$  VBH( $\text{B}_3\text{N}_2$ )
4. Table of bands appearing in the IR spectra of  $\text{M}(\text{B}_3\text{N}_2)$  salts and ammonia borane:  
 $(\text{NH}_4)(\text{B}_3\text{N}_2) \cdot 3(\text{B}_3\text{N}_3)$  Li( $\text{B}_3\text{N}_2$ ) Na( $\text{B}_3\text{N}_2$ ) K( $\text{B}_3\text{N}_2$ ) Rb( $\text{B}_3\text{N}_2$ ) Cs( $\text{B}_3\text{N}_2$ )  $\text{NH}_3\text{BH}_3$
5. Table of bands appearing in the Raman spectra of  $\text{M}(\text{B}_3\text{N}_2)$  salts and ammonia borane:  
 $(\text{NH}_4)(\text{B}_3\text{N}_2) \cdot 3(\text{B}_3\text{N}_3)$  Li( $\text{B}_3\text{N}_2$ ) Na( $\text{B}_3\text{N}_2$ ) K( $\text{B}_3\text{N}_2$ ) Rb( $\text{B}_3\text{N}_2$ ) Cs( $\text{B}_3\text{N}_2$ )  $\text{NH}_3\text{BH}_3$
6. Comparison IR and Raman spectra of  $\text{M}(\text{B}_3\text{N}_2)$  salts:  
 $(\text{NH}_4)(\text{B}_3\text{N}_2) \cdot 3(\text{B}_3\text{N}_3)$  Li( $\text{B}_3\text{N}_2$ ) Na( $\text{B}_3\text{N}_2$ ) K( $\text{B}_3\text{N}_2$ ) Rb( $\text{B}_3\text{N}_2$ ) Cs( $\text{B}_3\text{N}_2$ )
7. Thermal decomposition (TGA curves) of  $\text{M}(\text{B}_3\text{N}_2)$  salts:  
 $(\text{NH}_4)(\text{B}_3\text{N}_2) \cdot 3(\text{B}_3\text{N}_3)$  Li( $\text{B}_3\text{N}_2$ ) Na( $\text{B}_3\text{N}_2$ ) K( $\text{B}_3\text{N}_2$ ) Rb( $\text{B}_3\text{N}_2$ ) Cs( $\text{B}_3\text{N}_2$ )
8. IR spectra of the products of thermal decomposition of  $\text{M}(\text{B}_3\text{N}_2)$  salts:  
 $(\text{NH}_4)(\text{B}_3\text{N}_2) \cdot 3(\text{B}_3\text{N}_3)$  Li( $\text{B}_3\text{N}_2$ ) Na( $\text{B}_3\text{N}_2$ ) K( $\text{B}_3\text{N}_2$ ) Rb( $\text{B}_3\text{N}_2$ ) Cs( $\text{B}_3\text{N}_2$ )
9. Experimental crystal structure and Rietveld fit for  $(\text{NH}_4)(\text{B}_3\text{N}_2) \cdot 3(\text{B}_3\text{N}_3)$ :  
 $(\text{NH}_4)(\text{B}_3\text{N}_2) \cdot 3(\text{B}_3\text{N}_3)$
10. Table with the closest  $\text{H} \cdots \text{H}$  distances in the crystal structure of  $(\text{NH}_4)(\text{B}_3\text{N}_2) \cdot 3(\text{B}_3\text{N}_3)$ :  
 $(\text{NH}_4)(\text{B}_3\text{N}_2) \cdot 3(\text{B}_3\text{N}_3)$
11. Experimental and modelled NMR spectra for various possible compositions of the main product:  
 $(\text{NH}_4)(\text{B}_3\text{N}_2) \cdot 3(\text{B}_3\text{N}_3)$   $(\text{NH}_4)(\text{B}_3\text{N}_2)$   $(\text{B}_3\text{N}_3)$
12. Results of DFT optimisation of modelled crystal structures:  
 $(\text{NH}_4)(\text{B}_3\text{N}_2) \cdot 3(\text{B}_3\text{N}_3)$   $(\text{NH}_4)(\text{B}_3\text{N}_2)$   $(\text{B}_3\text{N}_3)$
13. Crystal structure VBH)[ $\text{B}(\text{C}_6\text{H}_5)_4$ ]  
VBH)[ $\text{B}(\text{C}_6\text{H}_5)_4$ ]
14. Results of DFT calculations regarding dehydrogenation process:  
 $(\text{NH}_4)(\text{B}_3\text{N}_2) \cdot 3(\text{B}_3\text{N}_3)$   $(\text{NH}_4)(\text{B}_3\text{N}_2)$   $(\text{B}_3\text{N}_3)$   $(\text{NH}_4)(\text{BH}_4)$   $\text{NH}_3\text{BH}_3$

## 1. Records of reporting synthesis of novel amidoborane and M(B3N2) salts and related compounds:

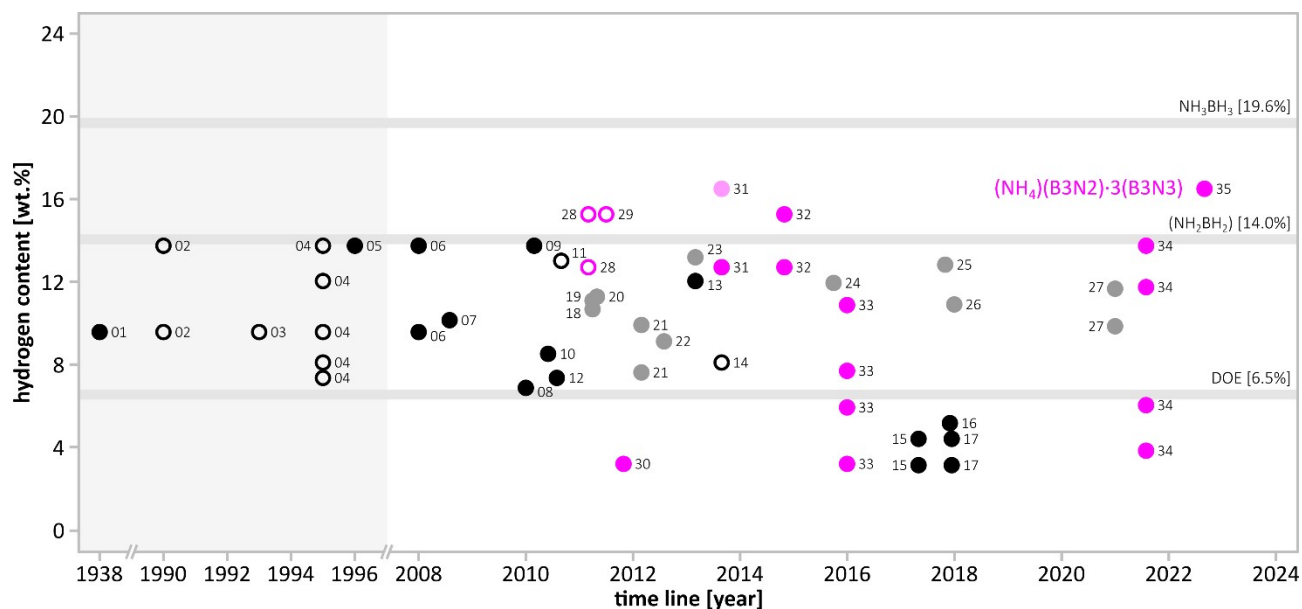

**Fig. S1.1.** Hydrogen content of monometallic amidoboranes (black), bimetallic amidoboranes (grey), M(B3N2) salts (magenta) and as a function of reporting date. Hydrogen content of  $\text{NH}_3\text{BH}_3$  (19.6%), polymeric  $(\text{NH}_2\text{BH}_2)$  (14.0%) and DOE ultimate target (6.5%) given as a reference. Reports and theses marked with hollow circles.

### References:

- 01 NaAB (9.5%) – H. I. Schlesinger, A.B. Burg, *J. Am. Chem. Soc.* 60 (1938) 290–299.
- 02  $\alpha$ -LiAB (13.7%), NaAB (9.5%) – P. M. Niedenzu, *Ph.D. Thesis*, Ohio State University, 1990.
- 03 NaAB (9.54%) – T. Salupo, *Ph.D. Thesis*, Ohio State University, 1993.
- 04  $\alpha$ -LiAB (13.7%), NaAB (9.5%), KAB (7.3%),  $\text{Mg}(\text{AB})_2$  (12.0%),  $\text{Zn}(\text{AB})_2$  (8.1%) – A. L. DeGraffenreid, *Ph.D. Thesis*, Ohio State University, 1995.
- 05  $\alpha$ -LiAB (13.7%) – A. G. Myers, *et al.*, *Tetrahedron Lett.* 37 (1996) 3623–3626.
- 06  $\alpha$ -LiAB (13.70%), NaAB (9.54%) – Z. Xiong, *et al.*, *Nature Mater.* 7 (2008) 138–141.
- 07  $\text{Ca}(\text{AB})_2$  (10.10%) – J. Spielmann, *et al.*, *Angew. Chem. Int. Ed.* 47 (2008) 6290–6295.
- 08  $\text{Sr}(\text{AB})_2$  (6.84%) – Q. Zhang, *et al.*, *J. Phys. Chem. C* 114 (2010) 1709–1714.
- 09  $\beta$ -LiAB (13.70%) – C. Wu, *et al.*, *Inorg. Chem.* 49 (2010) 4319–4323.
- 10  $\text{Y}(\text{AB})_3$  (8.47%) – R. V. Genova, *et al.*, *J. Alloys. Comp.* 499 (2010) 144–148.
- 11  $\text{Al}(\text{AB})_3$  (12.97%) – M. F. Hawthorne, *et al.*, *Final Report*, University of Missouri, 2010.
- 12 KAB (7.31%) – H. V. K. Diyabalanage, *et al.*, *J. Am. Chem. Soc.* 132 (2010) 11836–11837.
- 13  $\text{Mg}(\text{AB})_2$  (12.00%) – J. Luo, *et al.*, *Energy Environ. Sci.* 6 (2013) 1018–1025.
- 14  $\text{Zn}(\text{AB})_2$  (8.06%) – R. Owarzany, *M.Sc. Thesis*, University of Warsaw, 2013.
- 15 LT-RbAB (4.37%), LT-CsAB (3.1%) – I. V. Kazakov, *et al.*, *Polyhedron* 127 (2017) 186–190.
- 16  $\text{Ba}(\text{AB})_2$  (5.12%) – N. A. Shcherbina, *et al.*, *Rus. J. Gen. Chem.* 87 (2017) 2875–2877.
- 17 HT-RbAB (4.37%), HT-CsAB (3.1%) – R. Owarzany, *et al.*, *Dalton Trans.* 46 (2017) 16315–16320.
- 18  $\text{Na}_2\text{Mg}(\text{AB})_4$  (10.63%) – H. Wu, *et al.*, *Chem. Commun.* 47 (2011) 4102–4104.
- 19  $\text{NaMg}(\text{AB})_3$  (11.05%) – X. Kang, *et al.*, *Dalton Trans.* 40 (2011) 3799–3801.
- 20  $\text{LiNa}(\text{AB})_2$  (11.24%) – K. J. Fijalkowski, *et al.*, *Dalton Trans.* 40 (2011) 4407–4413.
- 21  $\text{KMg}(\text{AB})_3$  (9.88%),  $\text{RbMg}(\text{AB})_3$  (7.58%) – X. Kang, *et al.*, *Int. J. Hydrog. Energy* 37 (2012) 4259–4266.
- 22  $\text{K}_2\text{Mg}(\text{AB})_4$  (9.08%) – Y. S. Chua, *et al.*, *Chem. Mater.* 24 (2012) 3574–3581.
- 23  $\text{LiAl}(\text{AB})_4$  (13.15%) – G. Xia *et al.*, *Mater. Chem. A* 1 (2013) 1810–1820.
- 24  $\text{NaAl}(\text{AB})_4$  (11.9%) – I. Dovgaliuk *et al.*, *Chem. Eur. J.* 21 (2015) 14562–14570.
- 25  $\text{Li}_2\text{Mg}(\text{AB})_4$  (12.79%) – N. Biliškov *et al.*, *Chem. Eur. J.* 23 (2017) 16274–16282.
- 26  $\text{KAl}(\text{AB})_4$  (10.87%) – K. T. Møller, *et al.*, *Int. J. Hydrog. Energy* 43 (2018) 311–321.
- 27  $\text{Li}_2\text{Ca}(\text{AB})_4$  (11.63%),  $\text{Na}_2\text{Ca}(\text{AB})_4$  (9.81%) – I. Milanovic, *et al.*, *ACS Sustainable Chem. Eng.* 9 (2021) 2089–2099.
- 28  $\text{Li}(\text{B3N2})$  (15.22%),  $\text{Na}(\text{B3N2})$  (12.66%) – I. C. Evans, *Ph.D. Thesis*, University of Birmingham, 2011.
- 29  $\text{Li}(\text{B3N2})$  (15.22%) – K. R. Ryan, *Ph.D. Thesis*, University of Oxford, 2011.
- 30  $\alpha$ -VB(B3N2) (3.15%) – W. C. Ewing, *et al.*, *J. Am. Chem. Soc.* 133 (2011) 17093–17099.
- 31  $\text{Na}(\text{B3N2})$  (12.66%),  $(\text{NH}_4)(\text{B3N2})/3(\text{B3N3})$  (16.4%) – W. C. Ewing, *et al.*, *Inorg. Chem.* 52 (2013) 10690–10697.
- 32  $\text{Li}(\text{B3N2})$  (15.22%),  $\text{Na}(\text{B3N2})$  (12.66%) – K. J. Fijalkowski, *et al.*, *Phys. Chem. Chem. Phys.* 16 (2014) 23340–23346.
- 33  $\text{K}(\text{B3N2})$  (10.83%),  $\text{Rb}(\text{B3N2})$  (7.65%),  $\text{Cs}(\text{B3N2})$  (5.89%),  $\beta$ -VB(B3N2) (3.15%) – R. Owarzany, *et al.*, *Inorg. Chem.* 55 (2016) 37.
- 34  $(\text{Bu}_4\text{N})(\text{B3N2})$  (3.80%),  $(\text{Et}_4\text{N})(\text{B3N2})$  (6.00%),  $[\text{C}(\text{N}_3\text{H}_6)](\text{B3N2})$  (13.70%),  $[\text{C}(\text{N}_3\text{H}_5\text{CH}_3)](\text{B3N2})$  (11.7%) – X. M. Chen, *Chem Asian J.* 16 (2021) 1–7.
- 35  $(\text{NH}_4)(\text{B3N2})/3(\text{B3N3})$  (16.4%) – this study

## 2. Synthesis of alkali metal M(B3N2) salts:

All operations were performed under inert Ar atmosphere inside gloveboxes, MBRAUN Labmaster DP or Vigor SG1200 (O<sub>2</sub>, H<sub>2</sub>O < 1.0 ppm). Commercially available reagents and solvents were used: NH<sub>3</sub>BH<sub>3</sub> (98%, JSC Aviabor), NH<sub>4</sub>B(C<sub>6</sub>H<sub>5</sub>)<sub>4</sub> (99%, Sigma-Aldrich (later denoted as SA), C<sub>4</sub>H<sub>8</sub>O (99%, SA), CH<sub>2</sub>Cl<sub>2</sub> (99%, SA).

**Metathetic synthesis** was performed using (C<sub>18</sub>H<sub>39</sub>N<sub>4</sub>PH)(BH<sub>3</sub>NH<sub>2</sub>BH<sub>2</sub>NH<sub>2</sub>BH<sub>3</sub>) and NH<sub>4</sub>[B(C<sub>6</sub>H<sub>5</sub>)<sub>4</sub>] in anhydrous THF at room temperature under argon atmosphere:

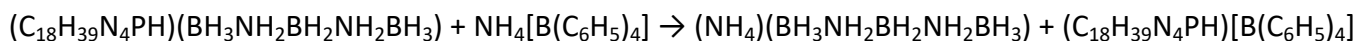

A follow-up process of dehydrogenation of NH<sub>4</sub>(BH<sub>3</sub>NH<sub>2</sub>BH<sub>2</sub>NH<sub>2</sub>BH<sub>3</sub>) occurs leading to neutral linear molecule NH<sub>3</sub>BH<sub>2</sub>NH<sub>2</sub>BH<sub>2</sub>NH<sub>2</sub>BH<sub>3</sub>:

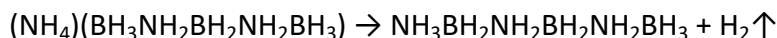

Obtained mixture of products was well soluble in THF. Side product (C<sub>18</sub>H<sub>39</sub>N<sub>4</sub>PH)[B(C<sub>6</sub>H<sub>5</sub>)<sub>4</sub>] was precipitated by washing with anhydrous DCM.

The main product crystallises in *P*2<sub>1</sub>/*c* unit cell with the lattice parameters of: a = 13.401(11) Å, b = 13.196(8) Å, c = 17.828(12) Å, β = 128.83(4)°, V = 2556(3) Å<sup>3</sup> and Z = 16. The crystalline product contains two compounds: NH<sub>4</sub>(BH<sub>3</sub>NH<sub>2</sub>BH<sub>2</sub>NH<sub>2</sub>BH<sub>3</sub>) and NH<sub>3</sub>BH<sub>2</sub>NH<sub>2</sub>BH<sub>2</sub>NH<sub>2</sub>BH<sub>3</sub> in molar ratio 1:3. In the manuscript, the product is denoted as “main product” or “(NH<sub>4</sub>)(B3N2)·3(B3N3)”.

The synthesis of (C<sub>18</sub>H<sub>39</sub>N<sub>4</sub>PH)(BH<sub>3</sub>NH<sub>2</sub>BH<sub>2</sub>NH<sub>2</sub>BH<sub>3</sub>) was performed according to the route described in our earlier paper (R. Owarzany, *et al.*, *Inorg. Chem.* 55 (2016) 37/) in a direct reaction of Verkade’s Base with 3 equivalents of ammonia borane in toluene at room temperature:

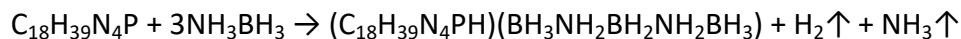

**Different route of metathetic synthesis** between Na(BH<sub>3</sub>NH<sub>2</sub>BH<sub>2</sub>NH<sub>2</sub>BH<sub>3</sub>) and NH<sub>4</sub>Cl in glyme at room temperature for 24 hours was reported earlier (W. C. Ewing *et al.* *Inorg. Chem.* 52 (2013) 10690.), however, the authors were aiming NH<sub>3</sub>BH<sub>2</sub>NH<sub>2</sub>BH<sub>2</sub>NH<sub>2</sub>BH<sub>3</sub> according to the following equation:

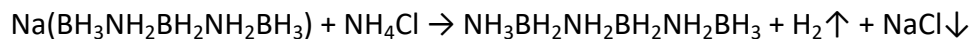

Judging from the comparison of NMR data presented by Ewing *et al.* to our own data we strongly believe that this process leads to (NH<sub>4</sub>)(B3N2)·3(B3N3) according to the following reaction equations:

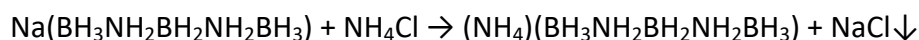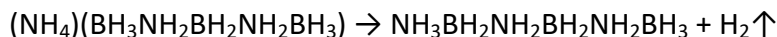

### 3. Table of $^{11}\text{B}$ NMR @ THF- $d_8$ chemical shifts of $\text{M}(\text{B3N2})$ salts and ammonia borane:

**Table S3.** Chemical shifts, positions of multiplets, excitation frequencies and J-coupling values observed in  $^{11}\text{B}$  NMR spectra in deuterated THF solution ( $\delta$  [ppm]) of  $(\text{NH}_4)(\text{B3N2})\cdot 3(\text{B3N3})$  at room temperature. Results for ammonia borane [AB], precursor [ $\beta$ -VBH(B3N2)] and alkali metal  $\text{M}(\text{B3N2})$  salts: [Li(B3N2), Na(B3N2), K(B3N2), Rb(B3N2), Cs(B3N2)] at RT are shown for comparison.

|                               | $\text{NH}_3\text{BH}_3$ | VBH(B3N2) | M(B3N2) salts |           |           |           |           | $(\text{NH}_4)(\text{B3N2})\cdot 3(\text{B3N3})$ |
|-------------------------------|--------------------------|-----------|---------------|-----------|-----------|-----------|-----------|--------------------------------------------------|
|                               |                          |           | Li(B3N2)      | Na(B3N2)  | K(B3N2)   | Rb(B3N2)  | Cs(B3N2)  |                                                  |
| <b>BH<sub>2</sub> triplet</b> | –                        | –6.590    | –6.743        | –7.155    | –7.499    | –7.410    | –7.792    | –9.95   –11.78                                   |
|                               | –                        | –8.184    | –8.360        | –8.582    | –8.568    | –8.424    | –8.384    | –10.40   –12.26                                  |
|                               | –                        | –9.716    | –9.966        | –10.227   | –9.591    | –9.491    | –9.042    | –10.85   –12.70                                  |
| <b>position</b>               | –                        | –8.163    | –8.356        | –8.654    | –8.553    | –8.442    | –8.406    | –10.4   –12.3                                    |
| <b><math>^1J</math> (B,H)</b> | –                        | 100 Hz    | 103 Hz        | 99 Hz     | 101 Hz    | 100 Hz    | 101 Hz    | 101 Hz   102 Hz                                  |
| <b>freq.</b>                  | 96.32 MHz                | 64.16 MHz | 96.32 MHz     | 96.32 MHz | 96.32 MHz | 96.32 MHz | 160.48MHz | 224.62 MHz                                       |

|                               | $\text{NH}_3\text{BH}_3$ | VBH(B3N2) | M(B3N2) salts |           |           |           |           | $(\text{NH}_4)(\text{B3N2})\cdot 3(\text{B3N3})$ |
|-------------------------------|--------------------------|-----------|---------------|-----------|-----------|-----------|-----------|--------------------------------------------------|
|                               |                          |           | Li(B3N2)      | Na(B3N2)  | K(B3N2)   | Rb(B3N2)  | Cs(B3N2)  |                                                  |
| <b>BH<sub>3</sub> quartet</b> | –18.184                  | –19.462   | –20.465       | –20.264   | –20.613   | –20.294   | –20.279   | –21.60                                           |
|                               | –19.632                  | –20.933   | –21.836       | –21.693   | –21.556   | –21.226   | –20.902   | –22.01                                           |
|                               | –21.144                  | –22.342   | –23.314       | –23.202   | –22.499   | –22.168   | –21.479   | –22.42                                           |
|                               | –22.610                  | –23.752   | –24.634       | –24.582   | –23.382   | –23.105   | –22.025   | –22.83                                           |
| <b>position</b>               | –20.393                  | –21.622   | –22.562       | –22.435   | –22.013   | –21.698   | –21.171   | –22.21                                           |
| <b><math>^1J</math> (B,H)</b> | 95 Hz                    | 91 Hz     | 90 Hz         | 91 Hz     | 89 Hz     | 90 Hz     | 94 Hz     | 91 HZ                                            |
| <b>freq.</b>                  | 96.32 MHz                | 64.16 MHz | 96.32 MHz     | 96.32 MHz | 96.32 MHz | 96.32 MHz | 160.48MHz | 224.62 MHz                                       |

#### 4. Table of bands appearing in the IR spectra of M(B3N2) salts and ammonia borane:

**Table S4.** Absorption bands detected in IR spectra (wavenumber [ $\text{cm}^{-1}$ ]) of  $\text{NH}_4(\text{B3N2}) \cdot 3(\text{B3N3})$  at room temperature. Results for ammonia borane [AB] and alkali metal M(B3N2) salts: [Li(B3N2), Na(B3N2), K(B3N2), Rb(B3N2), Cs(B3N2)] at RT. Absorption bands of ammonia borane at RT are shown for comparison. ( $\nu$  = stretching,  $\delta$  = deformation: bending and torsional modes).

| Band                                 | $\text{NH}_3\text{BH}_3$ | M(B3N2) salts              |                   |                            |                              |                              | $(\text{NH}_4)(\text{B3N2}) \cdot 3(\text{B3N3})$ |                                       |
|--------------------------------------|--------------------------|----------------------------|-------------------|----------------------------|------------------------------|------------------------------|---------------------------------------------------|---------------------------------------|
|                                      |                          | Li(B3N2)                   | Na(B3N2)          | K(B3N2)                    | Rb(B3N2)                     | Cs(B3N2)                     |                                                   |                                       |
| $\nu(\text{NH})$                     | 3311 vs                  | 3310 s                     | 3302 vs           | 3305 vs                    | 3308 m<br>3295 m             | 3313 w<br>3287 m             | 3306 vs<br>3288 vs<br><br>3268 sh                 |                                       |
|                                      | 3253 vs                  | 3273 m                     | 3256 m            | 3261 m                     | 3261 w<br>3252 w             | 3261 w<br>3235 m             | 3259 m<br>3239 m<br><br>3223 sh                   |                                       |
|                                      | 3196 s                   |                            |                   |                            |                              |                              |                                                   |                                       |
| $\nu(\text{BH})$                     |                          |                            |                   | 2420 sh                    |                              |                              | 2439 sh<br>2407 s<br>2357 s<br>2317 vs<br>2302 sh |                                       |
|                                      | 2347 vs                  | 2350 vs<br>2322 s          | 2364 s<br>2315 s  | 2352 m                     | 2390 sh<br>2346 s            | 2389 sh<br>2329 m            |                                                   |                                       |
|                                      | 2289 s                   | 2282 vs<br>2245 s          | 2286 vs           | 2304 s<br>2279 s<br>2259 s | 2294 vs<br>2263 s<br>2248 sh | 2291 vs                      | 2260 m                                            |                                       |
|                                      | 2118 m                   |                            |                   | 2210 sh                    | 2204 sh                      | 2248 s<br>2189 sh            |                                                   |                                       |
| $\delta(\text{NH})$                  | 1611 m                   |                            |                   |                            | 1617 vw                      |                              | 1604 sh<br>1572 w<br>1564 m<br>1556 m             |                                       |
|                                      |                          | 1571 vs                    | 1576 w<br>1556 m  | 1583 w<br>1568 m           | 1562 sh<br>1557 m            | 1579 vw<br>1565 w<br>1557 vw | 1480 w<br>1428 w<br>1415 m<br>1392 m<br>1375 w    |                                       |
| $\delta(\text{BH})$                  | 1163 vs                  | 1283 m<br>1226 s<br>1201 s | 1248 m            | 1244 m                     |                              | 1233 s<br>1206 m<br>1193 sh  | 1259 m<br>1231 s<br>1205 s                        | 1262 s<br>1244 s<br>1203 vs<br>1179 s |
|                                      |                          | 1148 s<br>1135 m           | 1199 vs<br>1175 m | 1202 s<br>1194 sh          | 1182 m<br>1128 w             | 1167 s<br>1134 m             | 1188 s<br>1171 s<br>1127 m                        | 1168 sh<br>1134 m<br>1118 w           |
|                                      |                          | 1067 s                     |                   | 1074 m                     | 1073 w                       | 1065 w                       | 1063 w                                            | 1078 w                                |
|                                      |                          |                            | 1044 m<br>1013 w  | 1055 m<br>999 w            | 1056 w<br>997 w              | 1038 w<br>1012 vw            | 1043 m<br>1001 w                                  | 1056 w<br>983 w                       |
| $\nu(\text{BN})$<br><br>and<br>other |                          | 916 w                      | 893 vw            | 893 vw<br>875 w            | 901 vw<br>873 vw             | 902 w<br>881 w               | 861 w                                             |                                       |
|                                      |                          | 874 vw<br>799 vw           | 870 w<br>785 vw   | 781 vw<br>727 vw           | 854 vw<br>811 vw<br>727 vw   | 856 w<br>791 vw<br>723 vw    | 804 vw<br>749 w<br>711 w                          |                                       |
|                                      |                          |                            |                   |                            |                              |                              |                                                   |                                       |

## 5. Table of bands appearing in the RAMAN spectra of M(B3N2) salts and ammonia borane:

**Table S5.** Absorption bands detected in Raman spectra (wavenumber [ $\text{cm}^{-1}$ ]) of  $\text{NH}_4(\text{B}_3\text{N}_2) \cdot 3(\text{B}_3\text{N}_3)$  at room temperature. Results for ammonia borane [AB] and alkali metal M(B3N2) salts: [Li(B3N2), Na(B3N2), K(B3N2), Rb(B3N2), Cs(B3N2)] at RT. Absorption bands of ammonia borane at RT are shown for comparison. ( $\nu$  = stretching,  $\delta$  = deformation: bending and torsional modes).

| Band                                 | $\text{NH}_3\text{BH}_3$         | M(B3N2) salts                         |                                        |                               |                                                                      |                                                                               | $(\text{NH}_4)(\text{B}_3\text{N}_2) \cdot 3(\text{B}_3\text{N}_3)$ |
|--------------------------------------|----------------------------------|---------------------------------------|----------------------------------------|-------------------------------|----------------------------------------------------------------------|-------------------------------------------------------------------------------|---------------------------------------------------------------------|
|                                      |                                  | Li(B3N2)                              | Na(B3N2)                               | K(B3N2)                       | Rb(B3N2)                                                             | Cs(B3N2)                                                                      |                                                                     |
| $\nu(\text{NH})$                     |                                  |                                       |                                        |                               | 3304 sh                                                              | 3307 sh                                                                       |                                                                     |
|                                      | 3314 m                           | 3314 m                                | 3302 s                                 | 3306 s                        | 3293 w<br>3288 w                                                     | 3303 w<br>3292 sh<br>3279 w                                                   | 3307 m<br>3288 m                                                    |
|                                      | 3253 vs<br><br>3177 m            | 3272 s                                | 3265 vs                                | 3263 vs                       | 3256 m<br>3245 m                                                     | 3258 m<br>3232 m                                                              | 3260 vs<br>3241 vs<br><br>3041 s                                    |
| $\nu(\text{BH})$                     | 2378 vs                          | 2418 vw<br>2370 w                     | 2403 w<br>2373 w                       | 2382 m<br>2347 m              | 2379 m<br>2341 m                                                     | 2379 m<br>2343 m                                                              | 2475 sh<br>2442 w<br>2394 m<br>2320 vs<br>2261 s                    |
|                                      | 2284 vs                          | 2282 m<br>2250 s                      | 2275 s<br>2243 s<br>2214 sh            | 2301 s<br>2274 s              | 2291 vs<br><br>2243 vs                                               | 2286 vs<br><br>2250 vs                                                        |                                                                     |
|                                      |                                  | 2166 vw                               |                                        | 2186 sh                       | 2192 sh                                                              |                                                                               |                                                                     |
| $\delta(\text{NH})$                  | 1598 m<br>1583 m                 | 1567 m                                | 1539 w<br>1519 vw                      | 1649 vw<br>1585 vw<br>1569 vw | 1608 vw<br><br>1565 w<br>1550 w                                      | 1645 vw<br><br>1566 w<br>1534 w                                               | 1578 s<br>1559 m                                                    |
|                                      | 1190 sh<br>1168 m<br><br>1069 vw | 1281 w<br>1259 vw<br>1226 w<br>1206 m | 1212 w                                 | 1227 w<br>1193 w<br>1168 w    | 1207 w<br>1188 m<br>1155 w<br>1122 vw<br>1056 vw                     | 1206 sh<br>1183 m<br>1163 m<br><br>1036 vw                                    | 1201 w<br>1184 w<br>1173 w<br>1155 w<br>1102 w<br>1027 m<br>998 vs  |
| $\nu(\text{BN})$<br><br>and<br>other | 800 w<br>785 m<br>729w           | 895 vw<br>873 w<br><br>806 w          | 856 vw<br>835 w<br>749 w<br><br>614 vw | 892 vw<br>871 w<br><br>778 w  | 895 w<br>862 w<br>847 w<br><br>779 w<br>721 w<br><br>653 w<br>639 vw | 915 w<br>899 vw<br>876 vw<br>851 w<br><br>783 vw<br>724 w<br>715 vw<br>643 vw | 857 w<br>796 w<br><br><br>667 m<br>618 w<br>604 s                   |

## 6. Comparison of IR and Raman spectra of alkali metal M(B3N2) salts:

IR and Raman spectra of  $\text{NH}_4(\text{B3N2})/3(\text{B3N3})$  and alkali metal M(B3N2) salts: [Li(B3N2), Na(B3N2), K(B3N2), Rb(B3N2), Cs(B3N2)]. NH and BH stretching and NH bending regions highlighted and magnified in separate figures.

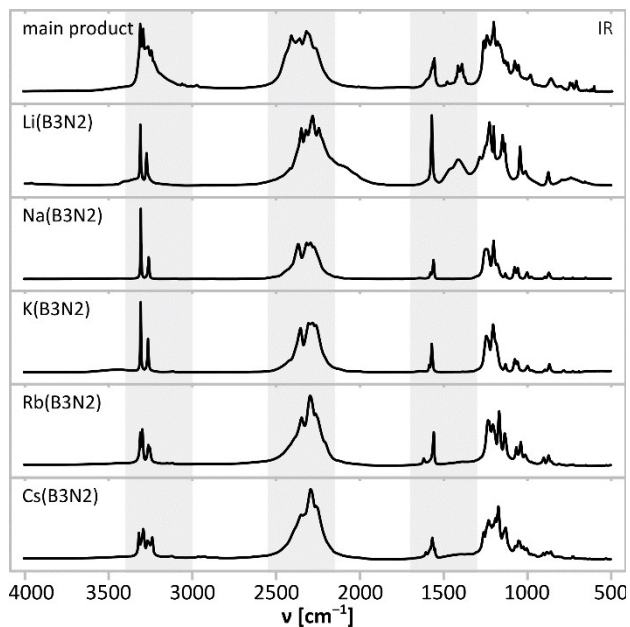

Fig. S6.1. Comparison of IR spectra of M(B3N2) salts.

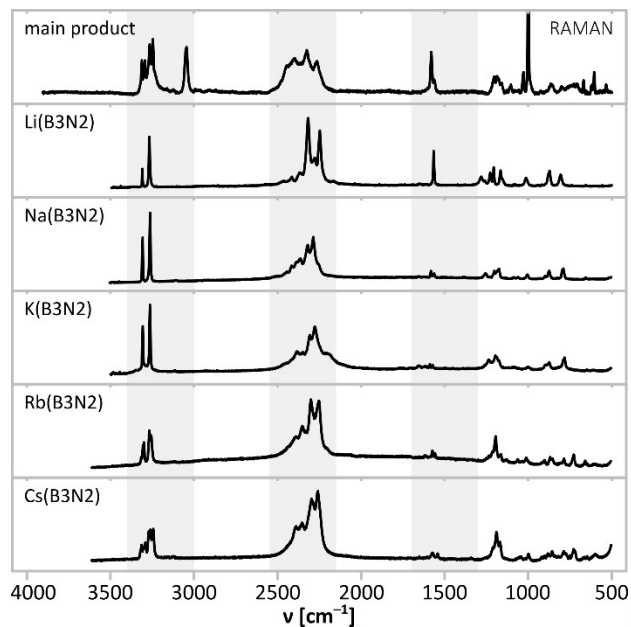

Fig. S6.2. Comparison of Raman spectra of M(B3N2) salts.

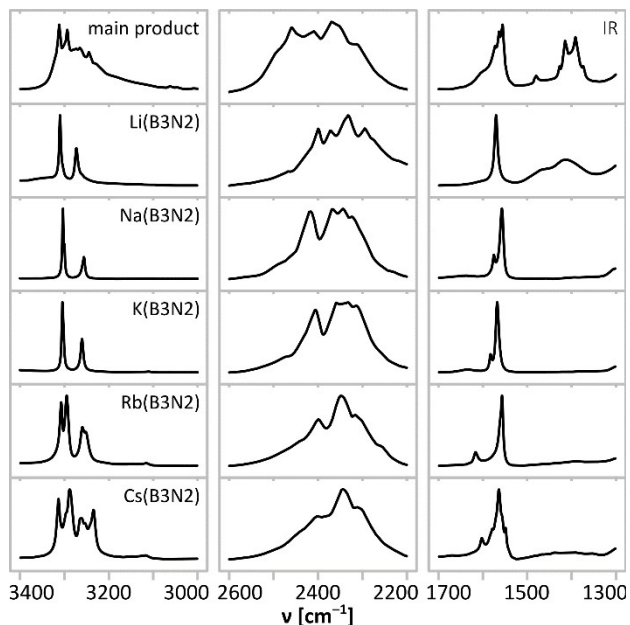

Fig. S6.3. Comparison of NH and BH stretching and NH bending regions of IR spectra of M(B3N2) salts.

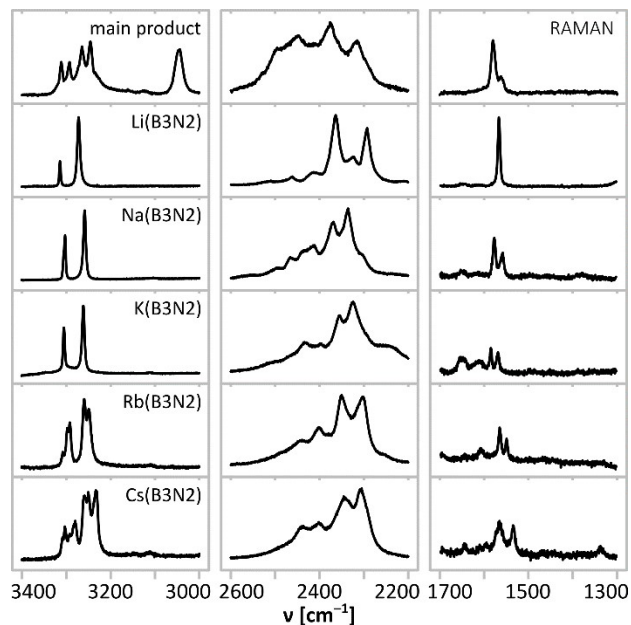

Fig. S6.4. Comparison of NH and BH stretching and NH bending regions of Raman spectra of M(B3N2) salts.

## 7. Thermal decomposition (TGA curves) of M(B3N2) salts:

The thermal decomposition of  $\text{NH}_4(\text{B3N2})/3(\text{B3N3})$  and alkali metal  $\text{M}(\text{B3N2})$  salts occurs at the temperature range of 120–180°C.

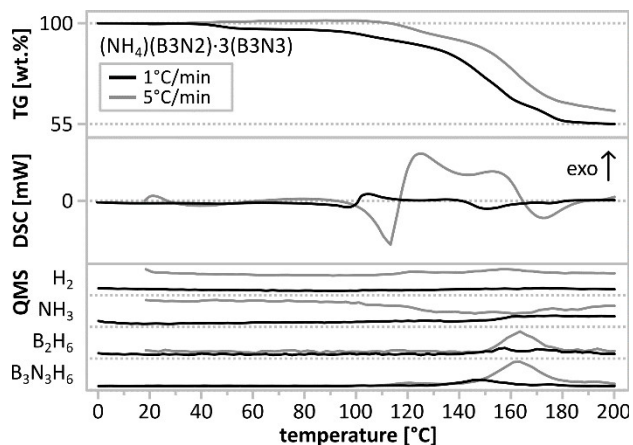

Fig.S7.1. TGA/DSC experiments of  $(\text{NH}_4)(\text{B3N2}) \cdot 3(\text{B3N3})$  with scanning rates (1 K/min -black, 5 K/min -grey).

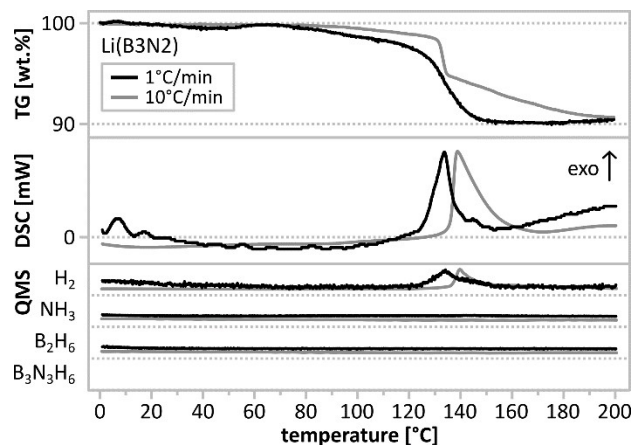

Fig.S7.2. TGA/DSC experiments of  $\text{Li}(\text{B3N2})$  sample with different scanning rates (1 K/min -black, 10 K/min -grey).

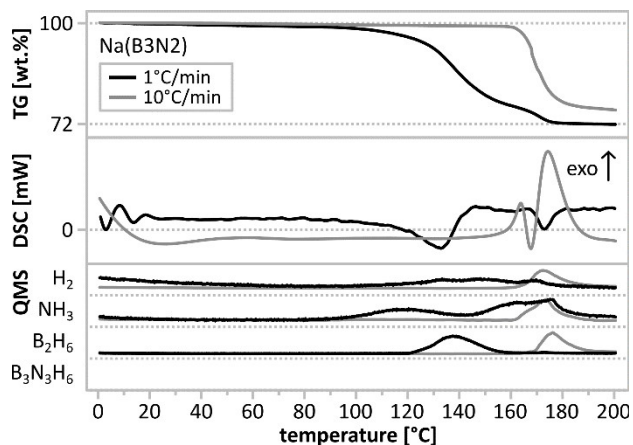

Fig.S7.3. TGA/DSC experiments of  $\text{Na}(\text{B3N2})$  sample with different scanning rates (1 K/min -black, 10 K/min -grey).

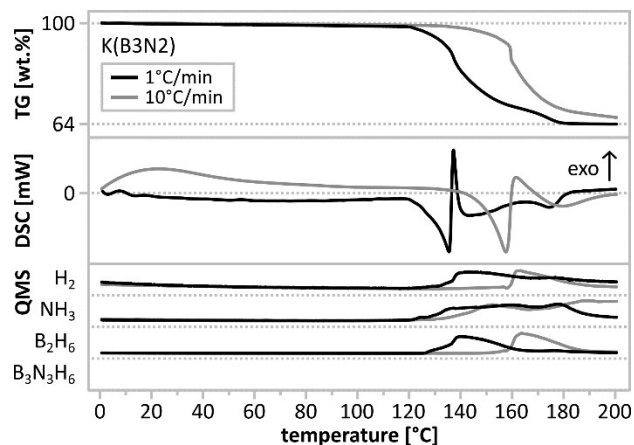

Fig.S7.4. TGA/DSC experiments of  $\text{K}(\text{B3N2})$  sample with different scanning rates (1 K/min -black, 10 K/min -grey).

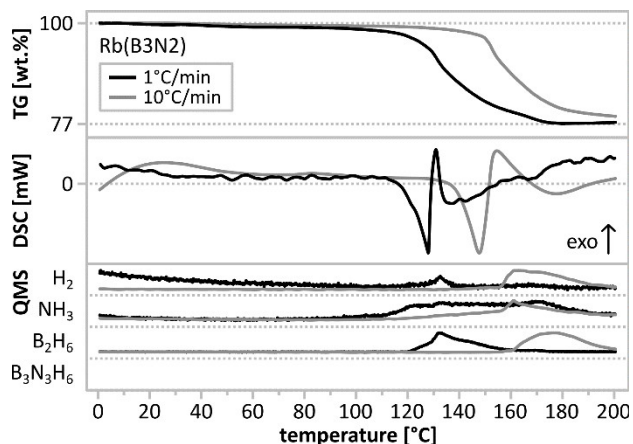

Fig.S7.5. TGA/DSC experiments of  $\text{Rb}(\text{B3N2})$  sample with different scanning rates (1 K/min -black, 10 K/min -grey).

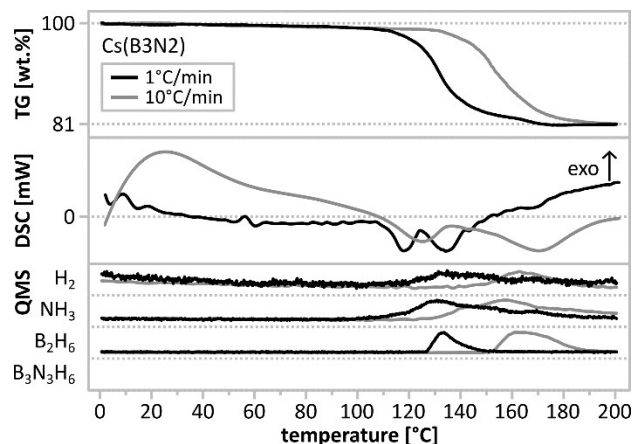

Fig.S7.6. TGA/DSC experiments of  $\text{Cs}(\text{B3N2})$  sample with different scanning rates (1 K/min -black, 10 K/min -grey).



## 8. IR spectra of the products of thermal decomposition of M(B<sub>3</sub>N<sub>2</sub>) salts:

The thermal decomposition of (NH<sub>4</sub>)(B<sub>3</sub>N<sub>2</sub>) leads to formation of boron nitride while decomposition of alkali metal M(B<sub>3</sub>N<sub>2</sub>) salts leads to formation of respective borohydrides.

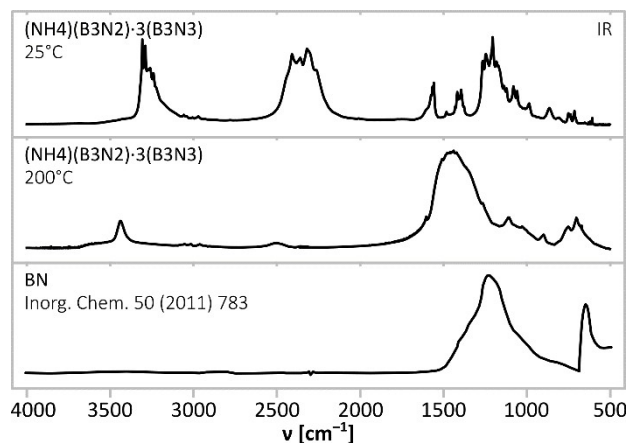

**Fig. S8.1.** IR spectra of the product of thermal decomposition of (NH<sub>4</sub>)(B<sub>3</sub>N<sub>2</sub>)·3(B<sub>3</sub>N<sub>3</sub>) sample.

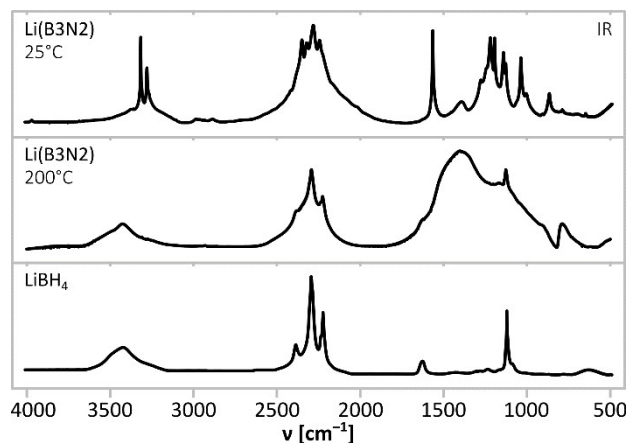

**Fig. S8.2.** IR spectra of the product of thermal decomposition of Li(B<sub>3</sub>N<sub>2</sub>) sample.

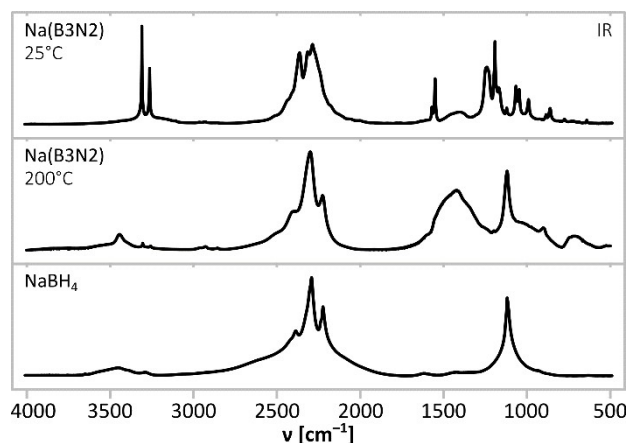

**Fig. S8.3.** IR spectra of the product of thermal decomposition of Na(B<sub>3</sub>N<sub>2</sub>) sample.

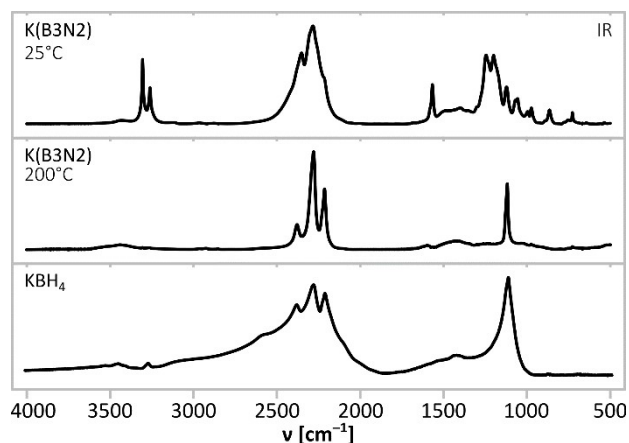

**Fig. S8.4.** IR spectra of the product of thermal decomposition of K(B<sub>3</sub>N<sub>2</sub>) sample.

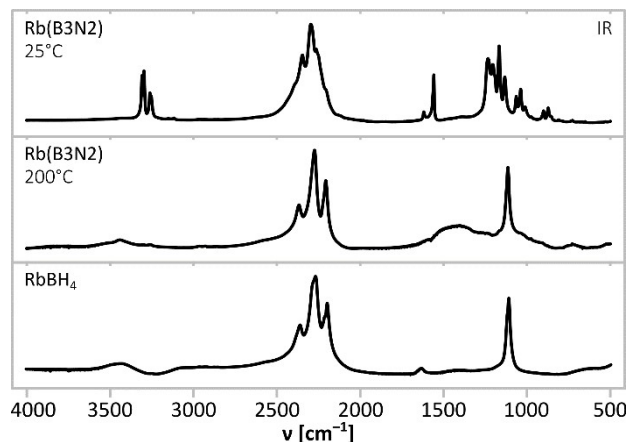

**Fig. S8.5.** IR spectra of the product of thermal decomposition of Rb(B<sub>3</sub>N<sub>2</sub>) sample.

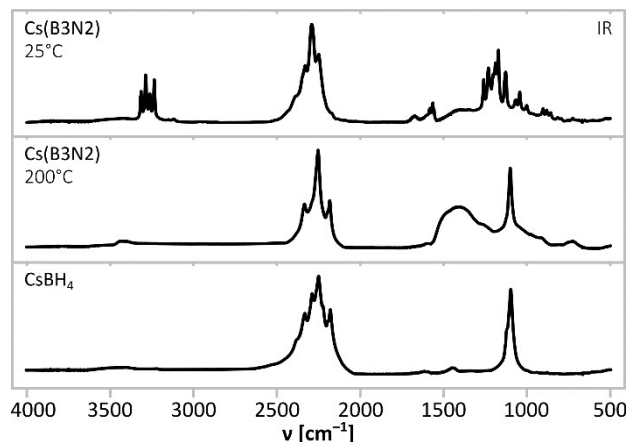

**Fig. S8.6.** IR spectra of the product of thermal decomposition of Cs(B<sub>3</sub>N<sub>2</sub>) sample.

## 9. Experimental crystal structure and Rietveld fit for $(\text{NH}_4)(\text{B3N2})\cdot 3(\text{B3N3})$ :

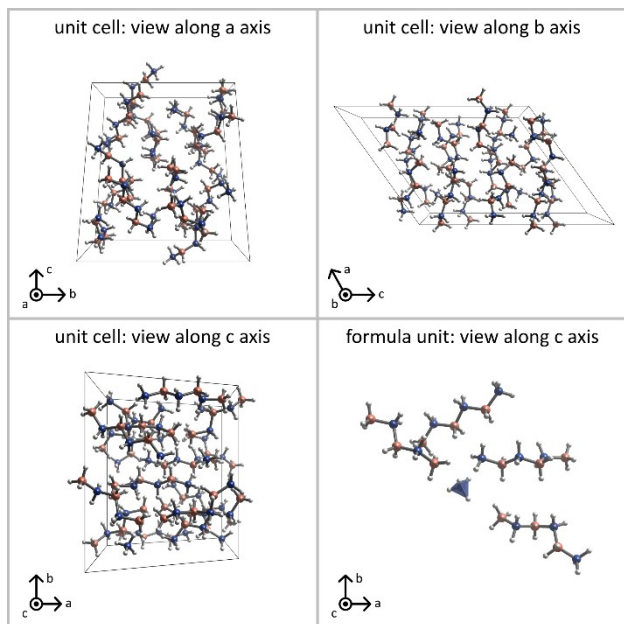

**Fig. S9.1.** Visualisation of the unit cell and formula unit of the main product:  $(\text{NH}_4)(\text{B3N2})\cdot 3(\text{B3N3})$

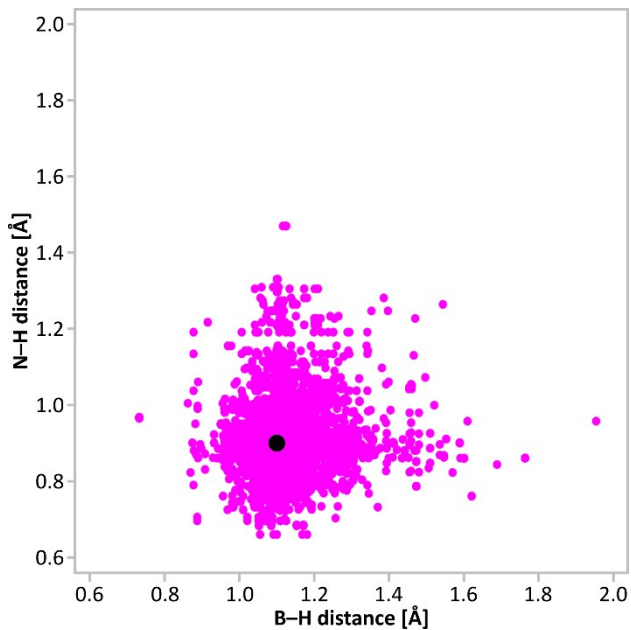

**Fig. S9.2.** Distribution of N-H and B-H distances in systems comprising both  $[\text{NH}_x]$  and  $[\text{BH}_x]$  groups found in structures in CSD database. Value of N-H and B-H distances in  $(\text{NH}_4)(\text{B3N2})\cdot 3(\text{B3N3})$  marked with a dot.

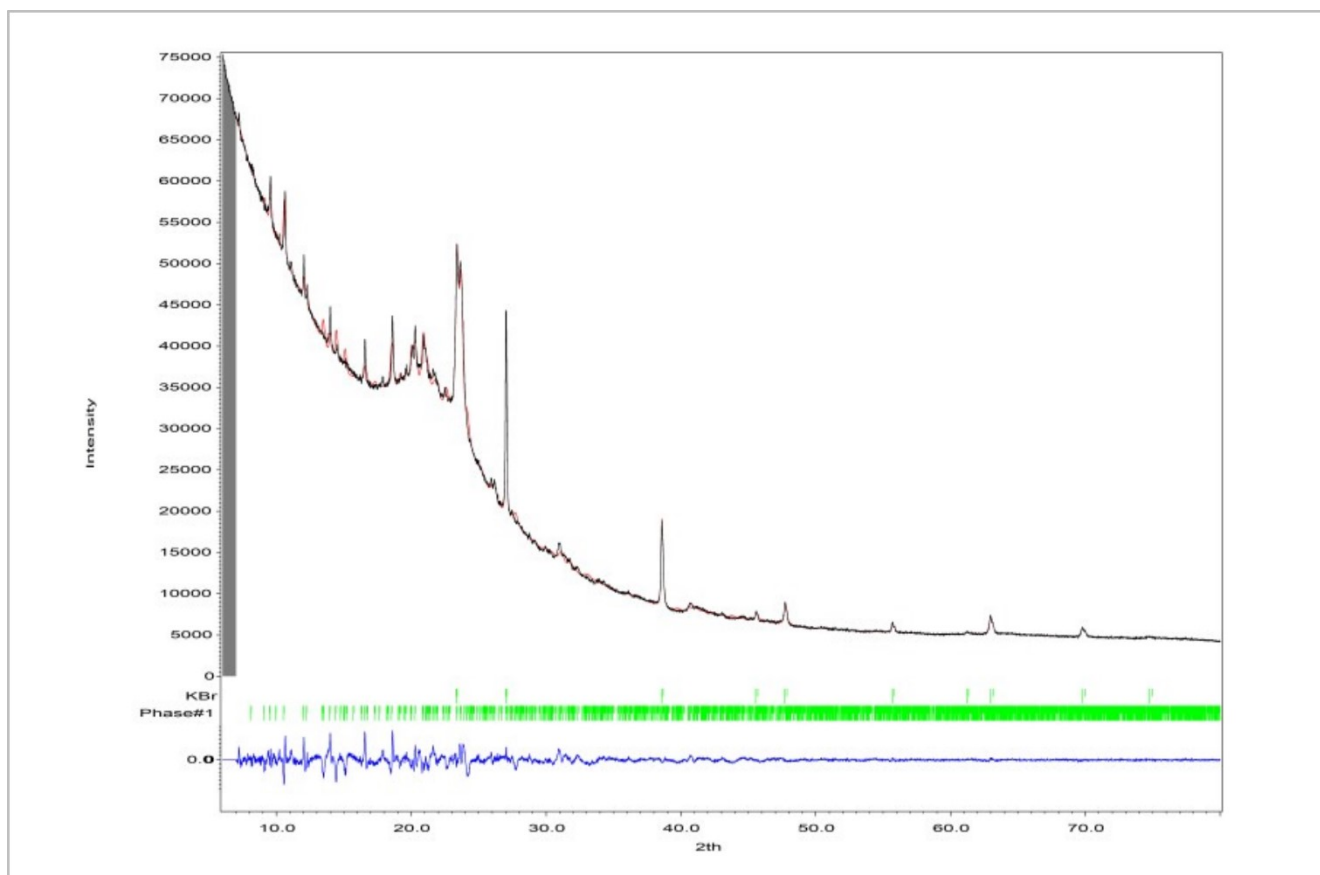

**Fig. S9.3.** Rietveld analysis of  $(\text{NH}_4)(\text{B3N2})/3(\text{B3N3})$  powder pattern.  $\text{CoK}_{\alpha 1,2}$ ,  $\lambda = 1.78901 \text{ \AA}$ .

**10. Table with the closest H...H distances in the crystal structure of (NH<sub>4</sub>)(B<sub>3</sub>N<sub>2</sub>)·3(B<sub>3</sub>N<sub>3</sub>):**

**Table S10.** List of the closest H...H distances in experimental crystal structure of (NH<sub>4</sub>)(B<sub>3</sub>N<sub>2</sub>)·3(B<sub>3</sub>N<sub>3</sub>). Listed only strong dihydrogen bonds, < 2 Å.

| H atom1 | H atom2 | Length [Å] | Length-VdW [Å] | Neighboring groups |
|---------|---------|------------|----------------|--------------------|
| H8      | H39     | 1.927      | -0.473         | B-H...H-N          |
| H12     | H29     | 1.928      | -0.472         | B-H...H-N          |
| H6      | H52     | 1.931      | -0.469         | B-H...H-N          |
| H12     | H53     | 1.935      | -0.465         | B-H...H-N          |
| H15     | H34     | 1.948      | -0.452         | B-H...H-B          |
| H54     | H42     | 1.949      | -0.451         | B-H...H-N          |
| H1      | H51     | 1.951      | -0.449         | B-H...H-N          |
| H50     | H64     | 1.971      | -0.429         | N-H...H-N          |
| H19     | H31     | 1.984      | -0.416         | B-H...H-B          |
| H52     | H64     | 1.987      | -0.413         | N-H...H-N          |
| H17     | H47     | 1.993      | -0.407         | B-H...H-N          |

**11. Experimental and modelled NMR spectra for various possible compositions of the main product:** NMR spectra were simulated for various discussed possible compositions of the main product to ease visual examination of the experimental spectra obtained by us and reported earlier by Ewing *et al.*, *Inorganic Chemistry* 52 (2013) 10690.

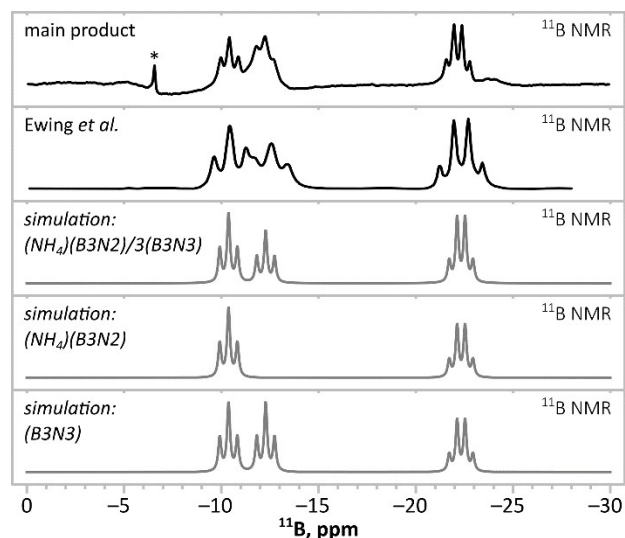

**Fig. S11.1.** Comparison of the experimental  $^{11}\text{B}$  NMR spectra obtained here and reported by Ewing *et al.* (*Inorganic Chemistry* 52 (2013) 10690) with spectra simulated for various possible compositions of the main product:  $(\text{NH}_4)(\text{B}_3\text{N}_2)\cdot 3(\text{B}_3\text{N}_3)$ ,  $(\text{NH}_4)(\text{B}_3\text{N}_2)$  and  $(\text{B}_3\text{N}_3)$ .

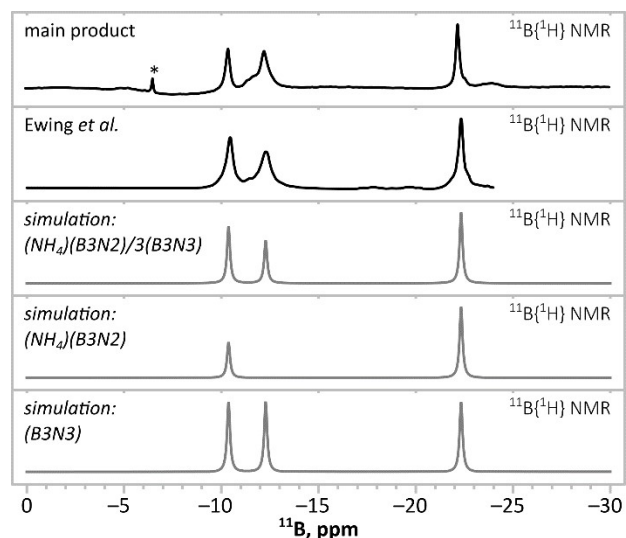

**Fig. S11.2.** Comparison of the experimental  $^{11}\text{B}\{^1\text{H}\}$  NMR spectra obtained here and reported by Ewing *et al.* (*Inorganic Chemistry* 52 (2013) 10690) with spectra simulated for various possible compositions of the main product:  $(\text{NH}_4)(\text{B}_3\text{N}_2)\cdot 3(\text{B}_3\text{N}_3)$ ,  $(\text{NH}_4)(\text{B}_3\text{N}_2)$  and  $(\text{B}_3\text{N}_3)$ .

## 12. Results of DFT optimisation of modelled crystal structures:

NH<sub>4</sub>(BH<sub>3</sub>NH<sub>2</sub>BH<sub>2</sub>NH<sub>2</sub>BH<sub>3</sub>)-3(NH<sub>3</sub>BH<sub>2</sub>NH<sub>2</sub>BH<sub>2</sub>NH<sub>2</sub>BH<sub>3</sub>), unit cell optimised

```
data_31_500eV\fine+cell
_audit_creation_date      2022-03-22
_audit_creation_method    'Materials Studio'
_symmetry_space_group_name_H-M  'P21/C'
_symmetry_Int_Tables_number  14
_symmetry_cell_setting    monoclinic
loop_
_symmetry_equiv_pos_as_xyz
  x,y,z
  -x,y+1/2,-z+1/2
  -x,-y,-z
  x,-y+1/2,z+1/2
_cell_length_a           13.2114
_cell_length_b           13.9512
_cell_length_c           19.0116
_cell_angle_alpha        90.0000
_cell_angle_beta         130.4617
_cell_angle_gamma        90.0000
loop_
_atom_site_label
_atom_site_type_symbol
_atom_site_fract_x
_atom_site_fract_y
_atom_site_fract_z
_atom_site_U_iso_or_equiv
_atom_site_adp_type
_atom_site_occupancy
B1  B  0.70821  0.11494  0.70797  0.05000  Uiso  1.00
N1  N  0.76629  0.14302  0.80732  0.05000  Uiso  1.00
B2  B  0.77307  0.25603  0.82169  0.05000  Uiso  1.00
N2  N  0.88332  0.27855  0.92649  0.05000  Uiso  1.00
B3  B  0.90995  0.38672  0.95751  0.05000  Uiso  1.00
H1  H  0.60523  0.15758  0.65051  0.05000  Uiso  1.00
H2  H  0.79337  0.12973  0.70200  0.05000  Uiso  1.00
H4  H  0.71177  0.11450  0.82381  0.05000  Uiso  1.00
H5  H  0.86071  0.11477  0.85440  0.05000  Uiso  1.00
H6  H  0.80153  0.29445  0.77863  0.05000  Uiso  1.00
H7  H  0.66525  0.28348  0.79429  0.05000  Uiso  1.00
H8  H  0.97286  0.25206  0.94872  0.05000  Uiso  1.00
H9  H  0.86665  0.24060  0.96452  0.05000  Uiso  1.00
H10 H  0.97588  0.38896  1.04154  0.05000  Uiso  1.00
H11 H  0.80194  0.42592  0.91975  0.05000  Uiso  1.00
H12 H  0.97000  0.42553  0.93710  0.05000  Uiso  1.00
B4  B  0.41303  0.33205  0.60553  0.05000  Uiso  1.00
N3  N  0.27925  0.35690  0.50627  0.05000  Uiso  1.00
B5  B  0.15136  0.33856  0.49619  0.05000  Uiso  1.00
N4  N  0.15353  0.41316  0.55956  0.05000  Uiso  1.00
B6  B  0.06225  0.39383  0.58541  0.05000  Uiso  1.00
H13 H  0.42249  0.24605  0.61536  0.05000  Uiso  1.00
H15 H  0.42037  0.37241  0.66568  0.05000  Uiso  1.00
H16 H  0.27593  0.42579  0.48531  0.05000  Uiso  1.00
H17 H  0.27253  0.31420  0.45908  0.05000  Uiso  1.00
H18 H  0.15917  0.25731  0.52314  0.05000  Uiso  1.00
H19 H  0.05145  0.35051  0.41580  0.05000  Uiso  1.00
H20 H  0.13000  0.48023  0.52964  0.05000  Uiso  1.00
H21 H  0.25125  0.41791  0.61940  0.05000  Uiso  1.00
```

|     |   |          |          |          |         |      |      |
|-----|---|----------|----------|----------|---------|------|------|
| H22 | H | -0.05515 | 0.39939  | 0.51583  | 0.05000 | Uiso | 1.00 |
| H23 | H | 0.08380  | 0.45473  | 0.64012  | 0.05000 | Uiso | 1.00 |
| H24 | H | 0.08547  | 0.31319  | 0.61846  | 0.05000 | Uiso | 1.00 |
| B7  | B | 0.35945  | 0.56131  | 0.01225  | 0.05000 | Uiso | 1.00 |
| N5  | N | 0.39871  | 0.66288  | -0.00050 | 0.05000 | Uiso | 1.00 |
| B8  | B | 0.35089  | 0.76107  | 0.01297  | 0.05000 | Uiso | 1.00 |
| N6  | N | 0.43801  | 0.78284  | 0.11929  | 0.05000 | Uiso | 1.00 |
| B9  | B | 0.43903  | 0.89230  | 0.14365  | 0.05000 | Uiso | 1.00 |
| H25 | H | 0.40686  | 0.49856  | -0.00341 | 0.05000 | Uiso | 1.00 |
| H26 | H | 0.39674  | 0.55325  | 0.08984  | 0.05000 | Uiso | 1.00 |
| H28 | H | 0.50119  | 0.66593  | 0.04116  | 0.05000 | Uiso | 1.00 |
| H29 | H | 0.36892  | 0.66512  | -0.06589 | 0.05000 | Uiso | 1.00 |
| H30 | H | 0.36881  | 0.82505  | -0.02191 | 0.05000 | Uiso | 1.00 |
| H31 | H | 0.23334  | 0.75618  | -0.02405 | 0.05000 | Uiso | 1.00 |
| H32 | H | 0.53513  | 0.76316  | 0.15269  | 0.05000 | Uiso | 1.00 |
| H33 | H | 0.40908  | 0.74092  | 0.14813  | 0.05000 | Uiso | 1.00 |
| H34 | H | 0.50214  | 0.93738  | 0.12797  | 0.05000 | Uiso | 1.00 |
| H35 | H | 0.32535  | 0.92289  | 0.09508  | 0.05000 | Uiso | 1.00 |
| H36 | H | 0.49200  | 0.89920  | 0.22589  | 0.05000 | Uiso | 1.00 |
| B10 | B | 1.12914  | 0.99464  | 0.79230  | 0.05000 | Uiso | 1.00 |
| N7  | N | 1.08247  | 0.88703  | 0.78744  | 0.05000 | Uiso | 1.00 |
| B11 | B | 0.92947  | 0.86664  | 0.70636  | 0.05000 | Uiso | 1.00 |
| N8  | N | 0.88287  | 0.77045  | 0.72226  | 0.05000 | Uiso | 1.00 |
| B12 | B | 0.72463  | 0.75969  | 0.65604  | 0.05000 | Uiso | 1.00 |
| H37 | H | 1.08482  | 1.04747  | 0.81782  | 0.05000 | Uiso | 1.00 |
| H38 | H | 1.25109  | 0.99819  | 0.84578  | 0.05000 | Uiso | 1.00 |
| H39 | H | 1.08213  | 1.01873  | 0.71408  | 0.05000 | Uiso | 1.00 |
| H40 | H | 1.10997  | 0.87212  | 0.85076  | 0.05000 | Uiso | 1.00 |
| H41 | H | 1.13739  | 0.84084  | 0.78158  | 0.05000 | Uiso | 1.00 |
| H42 | H | 0.90914  | 0.85943  | 0.63407  | 0.05000 | Uiso | 1.00 |
| H43 | H | 0.86774  | 0.93227  | 0.70464  | 0.05000 | Uiso | 1.00 |
| H44 | H | 0.92197  | 0.71094  | 0.71553  | 0.05000 | Uiso | 1.00 |
| H45 | H | 0.91808  | 0.76911  | 0.78909  | 0.05000 | Uiso | 1.00 |
| H46 | H | 0.68750  | 0.80414  | 0.69155  | 0.05000 | Uiso | 1.00 |
| H47 | H | 0.67311  | 0.79488  | 0.58006  | 0.05000 | Uiso | 1.00 |
| H48 | H | 0.69326  | 0.67556  | 0.64739  | 0.05000 | Uiso | 1.00 |
| N9  | N | 0.53664  | 0.37064  | 0.61627  | 0.05000 | Uiso | 1.00 |
| H50 | H | 0.54045  | 0.44470  | 0.61701  | 0.05000 | Uiso | 1.00 |
| H51 | H | 0.54125  | 0.34734  | 0.56683  | 0.05000 | Uiso | 1.00 |
| H52 | H | 0.62319  | 0.34723  | 0.67920  | 0.05000 | Uiso | 1.00 |
| N10 | N | 0.20232  | 0.54959  | -0.06080 | 0.05000 | Uiso | 1.00 |
| H53 | H | 0.15399  | 0.57777  | -0.03889 | 0.05000 | Uiso | 1.00 |
| H54 | H | 0.17501  | 0.47816  | -0.07588 | 0.05000 | Uiso | 1.00 |
| H55 | H | 0.15962  | 0.57929  | -0.12419 | 0.05000 | Uiso | 1.00 |
| N11 | N | 0.67472  | 0.00314  | 0.69163  | 0.05000 | Uiso | 1.00 |
| H57 | H | 0.65387  | -0.01839 | 0.63157  | 0.05000 | Uiso | 1.00 |
| H58 | H | 0.75445  | -0.03858 | 0.74368  | 0.05000 | Uiso | 1.00 |
| H59 | H | 0.59194  | -0.01451 | 0.68348  | 0.05000 | Uiso | 1.00 |
| N12 | N | 0.23793  | 0.07365  | 0.68214  | 0.05000 | Uiso | 1.00 |
| H61 | H | 0.21085  | 0.01630  | 0.63715  | 0.05000 | Uiso | 1.00 |
| H62 | H | 0.19238  | 0.13480  | 0.64331  | 0.05000 | Uiso | 1.00 |
| H63 | H | 0.34093  | 0.08208  | 0.72959  | 0.05000 | Uiso | 1.00 |
| H64 | H | 0.20121  | 0.05757  | 0.71582  | 0.05000 | Uiso | 1.00 |

NH4(BH3NH2BH2NH2BH3), unit cell optimised  
 data\_30\_from00\_noH-Hadd\_500eV\fine+cell  
 \_audit\_creation\_date 2022-03-22  
 \_audit\_creation\_method 'Materials Studio'  
 \_symmetry\_space\_group\_name\_H-M 'P21/C'  
 \_symmetry\_Int\_Tables\_number 14  
 \_symmetry\_cell\_setting monoclinic  
 loop\_  
 \_symmetry\_equiv\_pos\_as\_xyz  
 x,y,z  
 -x,y+1/2,-z+1/2  
 -x,-y,-z  
 x,-y+1/2,z+1/2  
 \_cell\_length\_a 15.1296  
 \_cell\_length\_b 14.0974  
 \_cell\_length\_c 18.5157  
 \_cell\_angle\_alpha 90.0000  
 \_cell\_angle\_beta 134.1837  
 \_cell\_angle\_gamma 90.0000  
 loop\_  
 \_atom\_site\_label  
 \_atom\_site\_type\_symbol  
 \_atom\_site\_fract\_x  
 \_atom\_site\_fract\_y  
 \_atom\_site\_fract\_z  
 \_atom\_site\_U\_iso\_or\_equiv  
 \_atom\_site\_adp\_type  
 \_atom\_site\_occupancy  
 B1 B 0.66514 0.10694 0.69465 0.05000 Uiso 1.00  
 N1 N 0.71546 0.20346 0.75835 0.05000 Uiso 1.00  
 B2 B 0.85400 0.20822 0.86832 0.05000 Uiso 1.00  
 N2 B 0.91110 0.30099 0.95489 0.05000 Uiso 1.00  
 B3 N 1.01642 0.24767 1.06367 0.05000 Uiso 1.00  
 B4 B 0.58384 0.42106 0.65635 0.05000 Uiso 1.00  
 N3 N 0.48530 0.38527 0.65775 0.05000 Uiso 1.00  
 B5 B 0.43120 0.46721 0.67502 0.05000 Uiso 1.00  
 N4 N 0.30905 0.43511 0.64480 0.05000 Uiso 1.00  
 B6 B 0.19360 0.41548 0.52834 0.05000 Uiso 1.00  
 B7 B 0.23139 0.77848 -0.05771 0.05000 Uiso 1.00  
 N5 N 0.29779 0.79874 0.05453 0.05000 Uiso 1.00  
 B8 B 0.43371 0.76148 0.14552 0.05000 Uiso 1.00  
 N6 N 0.53044 0.80777 0.14794 0.05000 Uiso 1.00  
 B9 B 0.67184 0.78858 0.24664 0.05000 Uiso 1.00  
 B10 B 1.04876 0.97755 0.69603 0.05000 Uiso 1.00  
 N7 N 0.98926 0.87693 0.67794 0.05000 Uiso 1.00  
 B11 B 0.84730 0.88149 0.61679 0.05000 Uiso 1.00  
 N8 N 0.79452 0.78276 0.61159 0.05000 Uiso 1.00  
 B12 B 0.64739 0.78172 0.53724 0.05000 Uiso 1.00  
 N9 N 0.30421 1.02782 0.92396 0.05000 Uiso 1.00  
 N10 N 0.89991 0.38928 0.23582 0.05000 Uiso 1.00  
 N11 N 0.40411 -0.02701 0.53429 0.05000 Uiso 1.00  
 N12 N 0.16159 0.03439 0.59474 0.05000 Uiso 1.00  
 H25 H 0.57587 0.08165 0.67916 0.00000 Uiso 1.00  
 H26 H 0.74209 0.04326 0.74155 0.00000 Uiso 1.00  
 H27 H 0.63368 0.12074 0.61368 0.00000 Uiso 1.00  
 H28 H 0.65741 0.21604 0.76811 0.00000 Uiso 1.00  
 H29 H 0.69738 0.25979 0.71420 0.00000 Uiso 1.00  
 H30 H 0.92670 0.20886 0.85760 0.00000 Uiso 1.00  
 H31 H 0.87080 0.13194 0.90858 0.00000 Uiso 1.00

|     |   |         |          |          |         |      |      |
|-----|---|---------|----------|----------|---------|------|------|
| H32 | H | 0.84498 | 0.34518  | 0.96014  | 0.00000 | Uiso | 1.00 |
| H33 | H | 0.96760 | 0.36208  | 0.95162  | 0.00000 | Uiso | 1.00 |
| H34 | H | 1.08626 | 0.28808  | 1.12530  | 0.00000 | Uiso | 1.00 |
| H35 | H | 1.05800 | 0.19576  | 1.05622  | 0.00000 | Uiso | 1.00 |
| H36 | H | 0.97446 | 0.21306  | 1.08218  | 0.00000 | Uiso | 1.00 |
| H37 | H | 0.54476 | 0.49423  | 0.60574  | 0.00000 | Uiso | 1.00 |
| H38 | H | 0.60038 | 0.36151  | 0.61857  | 0.00000 | Uiso | 1.00 |
| H39 | H | 0.67976 | 0.43811  | 0.74197  | 0.00000 | Uiso | 1.00 |
| H40 | H | 0.52471 | 0.33553  | 0.71369  | 0.00000 | Uiso | 1.00 |
| H41 | H | 0.41727 | 0.34701  | 0.59332  | 0.00000 | Uiso | 1.00 |
| H42 | H | 0.40227 | 0.53202  | 0.61842  | 0.00000 | Uiso | 1.00 |
| H43 | H | 0.51021 | 0.49321  | 0.76251  | 0.00000 | Uiso | 1.00 |
| H44 | H | 0.28544 | 0.48737  | 0.66769  | 0.00000 | Uiso | 1.00 |
| H45 | H | 0.32357 | 0.37640  | 0.68540  | 0.00000 | Uiso | 1.00 |
| H46 | H | 0.10247 | 0.39780  | 0.51231  | 0.00000 | Uiso | 1.00 |
| H47 | H | 0.21701 | 0.34798  | 0.50190  | 0.00000 | Uiso | 1.00 |
| H48 | H | 0.17298 | 0.48714  | 0.48003  | 0.00000 | Uiso | 1.00 |
| H49 | H | 0.23580 | 0.69217  | -0.06386 | 0.00000 | Uiso | 1.00 |
| H50 | H | 0.28267 | 0.81830  | -0.07846 | 0.00000 | Uiso | 1.00 |
| H51 | H | 0.12202 | 0.80402  | -0.11675 | 0.00000 | Uiso | 1.00 |
| H52 | H | 0.24488 | 0.76892  | 0.06495  | 0.00000 | Uiso | 1.00 |
| H53 | H | 0.29626 | 0.87047  | 0.06438  | 0.00000 | Uiso | 1.00 |
| H54 | H | 0.43438 | 0.67496  | 0.13879  | 0.00000 | Uiso | 1.00 |
| H55 | H | 0.46301 | 0.78204  | 0.22402  | 0.00000 | Uiso | 1.00 |
| H56 | H | 0.51767 | 0.88032  | 0.14098  | 0.00000 | Uiso | 1.00 |
| H57 | H | 0.51530 | 0.78744  | 0.08665  | 0.00000 | Uiso | 1.00 |
| H58 | H | 0.73769 | 0.83551  | 0.24300  | 0.00000 | Uiso | 1.00 |
| H59 | H | 0.69524 | 0.70472  | 0.25101  | 0.00000 | Uiso | 1.00 |
| H60 | H | 0.69072 | 0.81080  | 0.32069  | 0.00000 | Uiso | 1.00 |
| H61 | H | 0.98211 | 1.02676  | 0.62065  | 0.00000 | Uiso | 1.00 |
| H62 | H | 1.15010 | 0.96615  | 0.72590  | 0.00000 | Uiso | 1.00 |
| H63 | H | 1.06616 | 1.01664  | 0.76417  | 0.00000 | Uiso | 1.00 |
| H64 | H | 1.03969 | 0.84687  | 0.74802  | 0.00000 | Uiso | 1.00 |
| H65 | H | 1.00510 | 0.83410  | 0.64268  | 0.00000 | Uiso | 1.00 |
| H66 | H | 0.79154 | 0.90640  | 0.53074  | 0.00000 | Uiso | 1.00 |
| H67 | H | 0.83251 | 0.93665  | 0.65811  | 0.00000 | Uiso | 1.00 |
| H68 | H | 0.83316 | 0.76230  | 0.68178  | 0.00000 | Uiso | 1.00 |
| H69 | H | 0.81562 | 0.73071  | 0.58623  | 0.00000 | Uiso | 1.00 |
| H70 | H | 0.61644 | 0.70373  | 0.54393  | 0.00000 | Uiso | 1.00 |
| H71 | H | 0.60103 | 0.79436  | 0.45185  | 0.00000 | Uiso | 1.00 |
| H72 | H | 0.61714 | 0.84255  | 0.56348  | 0.00000 | Uiso | 1.00 |
| H73 | H | 0.23237 | 1.01081  | 0.84819  | 0.00000 | Uiso | 1.00 |
| H74 | H | 0.37678 | 0.98260  | 0.95540  | 0.00000 | Uiso | 1.00 |
| H75 | H | 0.33389 | 1.09739  | 0.93189  | 0.00000 | Uiso | 1.00 |
| H76 | H | 0.27302 | 1.02156  | 0.95924  | 0.00000 | Uiso | 1.00 |
| H77 | H | 0.92845 | 0.34726  | 0.29651  | 0.00000 | Uiso | 1.00 |
| H78 | H | 0.85564 | 0.34756  | 0.17184  | 0.00000 | Uiso | 1.00 |
| H79 | H | 0.83467 | 0.43444  | 0.22113  | 0.00000 | Uiso | 1.00 |
| H80 | H | 0.97006 | 0.42799  | 0.25162  | 0.00000 | Uiso | 1.00 |
| H81 | H | 0.40974 | -0.08366 | 0.57357  | 0.00000 | Uiso | 1.00 |
| H82 | H | 0.40191 | -0.05445 | 0.48091  | 0.00000 | Uiso | 1.00 |
| H83 | H | 0.32424 | 0.01191  | 0.49763  | 0.00000 | Uiso | 1.00 |
| H84 | H | 0.47946 | 0.01857  | 0.58567  | 0.00000 | Uiso | 1.00 |
| H85 | H | 0.17156 | -0.02595 | 0.56907  | 0.00000 | Uiso | 1.00 |
| H86 | H | 0.08359 | 0.07275  | 0.53422  | 0.00000 | Uiso | 1.00 |
| H87 | H | 0.14981 | 0.01190  | 0.64117  | 0.00000 | Uiso | 1.00 |
| H88 | H | 0.23755 | 0.07955  | 0.63623  | 0.00000 | Uiso | 1.00 |



(NH<sub>3</sub>BH<sub>2</sub>NH<sub>2</sub>BH<sub>2</sub>NH<sub>2</sub>BH<sub>3</sub>), unit cell optimised

data\_32\_500eV\fine+cell

\_audit\_creation\_date 2022-04-05  
\_audit\_creation\_method 'Materials Studio'  
\_symmetry\_space\_group\_name\_H-M 'P21/C'  
\_symmetry\_Int\_Tables\_number 14  
\_symmetry\_cell\_setting monoclinic

loop\_

\_symmetry\_equiv\_pos\_as\_xyz

x,y,z

-x,y+1/2,-z+1/2

-x,-y,-z

x,-y+1/2,z+1/2

\_cell\_length\_a 14.0521

\_cell\_length\_b 12.5784

\_cell\_length\_c 19.2528

\_cell\_angle\_alpha 90.0000

\_cell\_angle\_beta 128.7292

\_cell\_angle\_gamma 90.0000

loop\_

\_atom\_site\_label

\_atom\_site\_type\_symbol

\_atom\_site\_fract\_x

\_atom\_site\_fract\_y

\_atom\_site\_fract\_z

\_atom\_site\_U\_iso\_or\_equiv

\_atom\_site\_adp\_type

\_atom\_site\_occupancy

|     |   |         |         |         |         |      |      |
|-----|---|---------|---------|---------|---------|------|------|
| B1  | B | 0.61234 | 0.14161 | 0.69593 | 0.05000 | Uiso | 1.00 |
| N1  | N | 0.74985 | 0.13798 | 0.78118 | 0.05000 | Uiso | 1.00 |
| B2  | B | 0.80335 | 0.24827 | 0.83148 | 0.05000 | Uiso | 1.00 |
| N2  | N | 0.94601 | 0.24008 | 0.90513 | 0.05000 | Uiso | 1.00 |
| B3  | B | 1.00612 | 0.33672 | 0.97390 | 0.05000 | Uiso | 1.00 |
| H1  | H | 0.54946 | 0.17792 | 0.71315 | 0.05000 | Uiso | 1.00 |
| H2  | H | 0.60187 | 0.18975 | 0.63663 | 0.05000 | Uiso | 1.00 |
| H4  | H | 0.76311 | 0.08260 | 0.82641 | 0.05000 | Uiso | 1.00 |
| H5  | H | 0.80196 | 0.11174 | 0.76378 | 0.05000 | Uiso | 1.00 |
| H6  | H | 0.78333 | 0.31438 | 0.77695 | 0.05000 | Uiso | 1.00 |
| H7  | H | 0.75652 | 0.27053 | 0.86549 | 0.05000 | Uiso | 1.00 |
| H8  | H | 0.98548 | 0.23333 | 0.87482 | 0.05000 | Uiso | 1.00 |
| H9  | H | 0.97069 | 0.17067 | 0.94111 | 0.05000 | Uiso | 1.00 |
| H10 | H | 1.00173 | 0.31692 | 1.03399 | 0.05000 | Uiso | 1.00 |
| H11 | H | 0.95188 | 0.41887 | 0.93541 | 0.05000 | Uiso | 1.00 |
| H12 | H | 1.11486 | 0.34492 | 1.00700 | 0.05000 | Uiso | 1.00 |
| B4  | B | 0.50969 | 0.43569 | 0.71360 | 0.05000 | Uiso | 1.00 |
| N3  | N | 0.46702 | 0.38819 | 0.62292 | 0.05000 | Uiso | 1.00 |
| B5  | B | 0.33020 | 0.34237 | 0.55254 | 0.05000 | Uiso | 1.00 |
| N4  | N | 0.25702 | 0.34528 | 0.59044 | 0.05000 | Uiso | 1.00 |
| B6  | B | 0.17134 | 0.44485 | 0.56525 | 0.05000 | Uiso | 1.00 |
| H13 | H | 0.50674 | 0.36814 | 0.75773 | 0.05000 | Uiso | 1.00 |
| H15 | H | 0.45024 | 0.51405 | 0.70061 | 0.05000 | Uiso | 1.00 |
| H16 | H | 0.47623 | 0.44544 | 0.58905 | 0.05000 | Uiso | 1.00 |
| H17 | H | 0.52384 | 0.32667 | 0.63483 | 0.05000 | Uiso | 1.00 |
| H18 | H | 0.33803 | 0.24984 | 0.53711 | 0.05000 | Uiso | 1.00 |
| H19 | H | 0.27691 | 0.39738 | 0.48626 | 0.05000 | Uiso | 1.00 |
| H20 | H | 0.31598 | 0.33436 | 0.65830 | 0.05000 | Uiso | 1.00 |
| H21 | H | 0.20393 | 0.27761 | 0.56705 | 0.05000 | Uiso | 1.00 |
| H22 | H | 0.22991 | 0.52690 | 0.58489 | 0.05000 | Uiso | 1.00 |
| H23 | H | 0.12913 | 0.44167 | 0.60495 | 0.05000 | Uiso | 1.00 |

|     |   |         |          |          |         |      |      |
|-----|---|---------|----------|----------|---------|------|------|
| H24 | H | 0.08772 | 0.44511  | 0.48540  | 0.05000 | Uiso | 1.00 |
| B7  | B | 0.27345 | 0.57022  | -0.00885 | 0.05000 | Uiso | 1.00 |
| N5  | N | 0.26635 | 0.66818  | -0.06284 | 0.05000 | Uiso | 1.00 |
| B8  | B | 0.22211 | 0.77997  | -0.05360 | 0.05000 | Uiso | 1.00 |
| N6  | N | 0.33300 | 0.83259  | 0.03608  | 0.05000 | Uiso | 1.00 |
| B9  | B | 0.44363 | 0.86757  | 0.03827  | 0.05000 | Uiso | 1.00 |
| H25 | H | 0.31804 | 0.49323  | -0.01834 | 0.05000 | Uiso | 1.00 |
| H26 | H | 0.33068 | 0.59327  | 0.06945  | 0.05000 | Uiso | 1.00 |
| H28 | H | 0.34950 | 0.68144  | -0.04834 | 0.05000 | Uiso | 1.00 |
| H29 | H | 0.20852 | 0.64938  | -0.12983 | 0.05000 | Uiso | 1.00 |
| H30 | H | 0.19464 | 0.83592  | -0.11562 | 0.05000 | Uiso | 1.00 |
| H31 | H | 0.13695 | 0.76681  | -0.05285 | 0.05000 | Uiso | 1.00 |
| H32 | H | 0.36163 | 0.78334  | 0.08860  | 0.05000 | Uiso | 1.00 |
| H33 | H | 0.29991 | 0.89825  | 0.04691  | 0.05000 | Uiso | 1.00 |
| H34 | H | 0.41205 | 0.94339  | -0.01110 | 0.05000 | Uiso | 1.00 |
| H35 | H | 0.53224 | 0.88970  | 0.11504  | 0.05000 | Uiso | 1.00 |
| H36 | H | 0.47107 | 0.79357  | 0.01180  | 0.05000 | Uiso | 1.00 |
| B10 | B | 1.01084 | 1.09682  | 0.78046  | 0.05000 | Uiso | 1.00 |
| N7  | N | 1.00571 | 0.98490  | 0.81574  | 0.05000 | Uiso | 1.00 |
| B11 | B | 0.89496 | 0.91200  | 0.74411  | 0.05000 | Uiso | 1.00 |
| N8  | N | 0.88698 | 0.81275  | 0.79116  | 0.05000 | Uiso | 1.00 |
| B12 | B | 0.76080 | 0.75282  | 0.73529  | 0.05000 | Uiso | 1.00 |
| H37 | H | 0.91116 | 1.14046  | 0.73976  | 0.05000 | Uiso | 1.00 |
| H38 | H | 1.08492 | 1.15377  | 0.84346  | 0.05000 | Uiso | 1.00 |
| H39 | H | 1.03831 | 1.08470  | 0.73181  | 0.05000 | Uiso | 1.00 |
| H40 | H | 1.00795 | 0.99774  | 0.86972  | 0.05000 | Uiso | 1.00 |
| H41 | H | 1.08598 | 0.94429  | 0.84318  | 0.05000 | Uiso | 1.00 |
| H42 | H | 0.90823 | 0.88165  | 0.69059  | 0.05000 | Uiso | 1.00 |
| H43 | H | 0.79993 | 0.96281  | 0.70640  | 0.05000 | Uiso | 1.00 |
| H44 | H | 0.95736 | 0.76075  | 0.81376  | 0.05000 | Uiso | 1.00 |
| H45 | H | 0.90141 | 0.83918  | 0.84788  | 0.05000 | Uiso | 1.00 |
| H46 | H | 0.68411 | 0.81054  | 0.72636  | 0.05000 | Uiso | 1.00 |
| H48 | H | 0.76990 | 0.66919  | 0.77091  | 0.05000 | Uiso | 1.00 |
| N9  | N | 0.64892 | 0.47383  | 0.77073  | 0.05000 | Uiso | 1.00 |
| H50 | H | 0.65955 | 0.53699  | 0.74190  | 0.05000 | Uiso | 1.00 |
| H51 | H | 0.70708 | 0.41277  | 0.78183  | 0.05000 | Uiso | 1.00 |
| H52 | H | 0.68082 | 0.49842  | 0.83280  | 0.05000 | Uiso | 1.00 |
| N10 | N | 0.13759 | 0.54192  | -0.04916 | 0.05000 | Uiso | 1.00 |
| H53 | H | 0.10005 | 0.59620  | -0.03170 | 0.05000 | Uiso | 1.00 |
| H54 | H | 0.12833 | 0.46828  | -0.02971 | 0.05000 | Uiso | 1.00 |
| H55 | H | 0.07927 | 0.54020  | -0.11808 | 0.05000 | Uiso | 1.00 |
| N11 | N | 0.56770 | 0.02149  | 0.66238  | 0.05000 | Uiso | 1.00 |
| H57 | H | 0.48257 | 0.01895  | 0.60065  | 0.05000 | Uiso | 1.00 |
| H58 | H | 0.62717 | -0.02152 | 0.65896  | 0.05000 | Uiso | 1.00 |
| H59 | H | 0.55927 | -0.01953 | 0.70490  | 0.05000 | Uiso | 1.00 |
| N12 | N | 0.27916 | 0.22761  | 0.86024  | 0.05000 | Uiso | 1.00 |
| H61 | H | 0.36599 | 0.19486  | 0.90001  | 0.05000 | Uiso | 1.00 |
| H63 | H | 0.28219 | 0.29363  | 0.89304  | 0.05000 | Uiso | 1.00 |
| H64 | H | 0.22046 | 0.17569  | 0.85841  | 0.05000 | Uiso | 1.00 |

### 13. Crystal structure (VBH)[B(C<sub>6</sub>H<sub>5</sub>)<sub>4</sub>]

**Table 13.1.** Crystal structure parameters of (C<sub>18</sub>H<sub>39</sub>N<sub>4</sub>PH)[B(C<sub>6</sub>H<sub>5</sub>)<sub>4</sub>].

| Compound                             | (C <sub>18</sub> H <sub>39</sub> N <sub>4</sub> PH)[B(C <sub>6</sub> H <sub>5</sub> ) <sub>4</sub> ] |
|--------------------------------------|------------------------------------------------------------------------------------------------------|
| K <sub>α</sub> (Å)                   | 1.54184 (Cu)                                                                                         |
| Temperature (K)                      | 100(2)                                                                                               |
| Space group                          | <i>P</i> <sup>1</sup>                                                                                |
| Z                                    | 4                                                                                                    |
| <i>a</i> (Å)                         | 11.7376(3)                                                                                           |
| <i>b</i> (Å)                         | 19.5388(5)                                                                                           |
| <i>c</i> (Å)                         | 20.5479(4)                                                                                           |
| $\alpha$ (°)                         | 61.751(2)                                                                                            |
| $\beta$ (°)                          | 73.618(2)                                                                                            |
| $\gamma$ (°)                         | 89.605(2)                                                                                            |
| <i>V</i> (Å <sup>3</sup> )           | 3937.71(18)                                                                                          |
| $\rho_{calc.}$ (g cm <sup>-3</sup> ) | 1.118                                                                                                |
| $\mu_{exp.}$ (mm <sup>-1</sup> )     | 0.856                                                                                                |
| $\vartheta_{max}$ (°)                | 75.2030                                                                                              |
| <i>R</i> <sub>1</sub>                | 0.0695                                                                                               |
| <i>wR</i> <sub>2</sub>               | 0.2094                                                                                               |
| <i>Goof</i>                          | 1.048                                                                                                |
| Crystal size (mm×mm×mm)              | 0.06 x 0.16 x 0.20                                                                                   |
| Crystal colour                       | colorless                                                                                            |
| CCDC No.                             | 2195203                                                                                              |

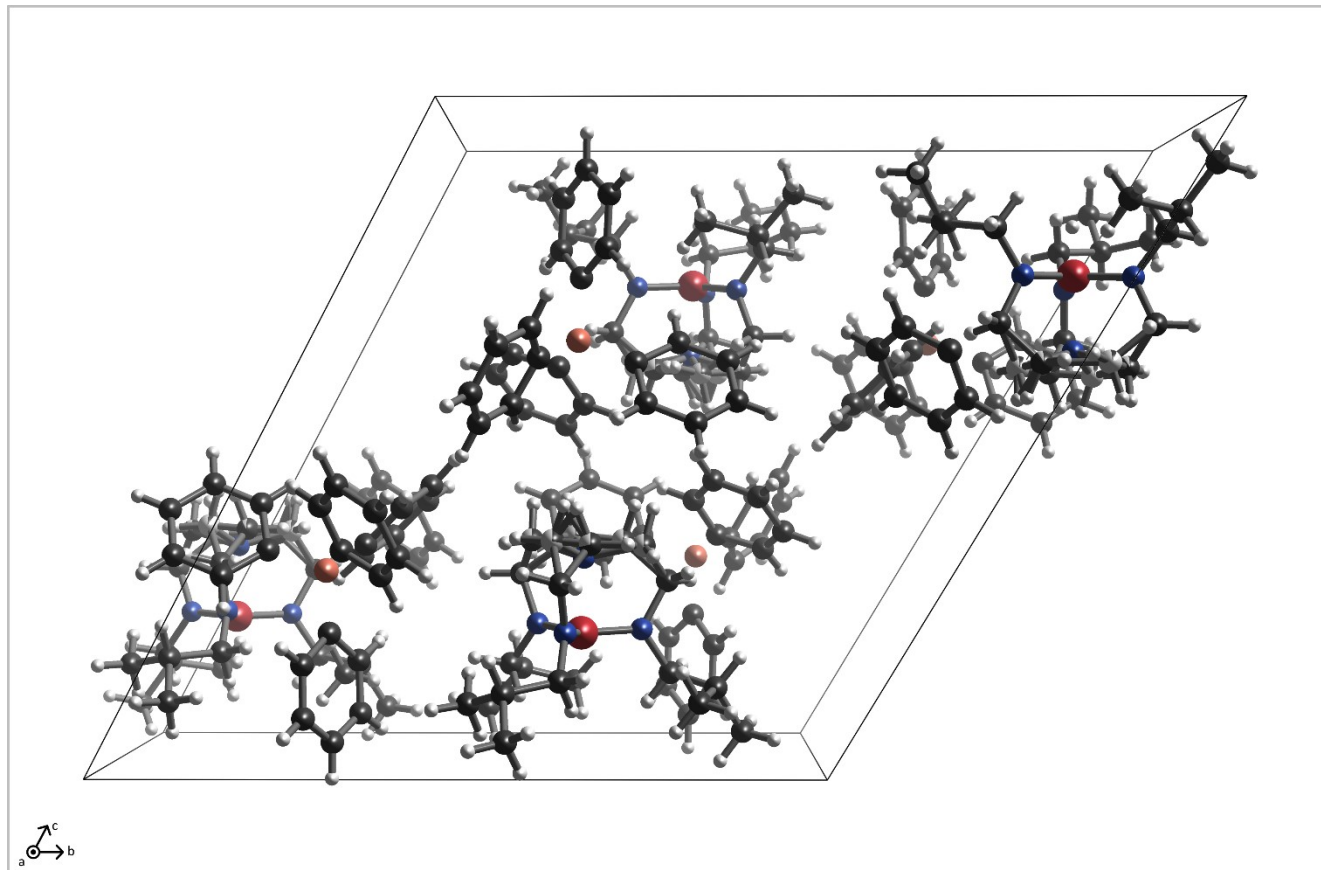

**Fig. S13.2.** Visualisation of the unit cell of the side product: (C<sub>18</sub>H<sub>39</sub>N<sub>4</sub>PH)[B(C<sub>6</sub>H<sub>5</sub>)<sub>4</sub>].

## 14. Molecular DFT calculations

Summary of energies and coordinates of investigated species. Three top energy values (yellow) are for r2SCAN-3c method, while the bottom (green) is single point energy obtained from  $\omega$ B97X-V/def2-TZVP/D4 method.  $\nu_{im}$  denotes imaginary mode in transition state. All values are calculated with CPCM solvent model.

### 1. Decomposition of $\text{NH}_4^+(\text{B3N2})^-$ into $\text{N}_3\text{B}_3\text{H}_{14}$ and $\text{H}_2$ in THF:

$\Delta\Delta G^* = 69 \text{ kJ mol}^{-1}$  (17 kcal mol<sup>-1</sup>)

| Substrates: $\text{NH}_4^+(\text{B3N2})^-$ |                   |                   | Transition state; $\nu_{im} = -320 \text{ cm}^{-1}$ |                   |                   | Product: $\text{B}_3\text{N}_3\text{H}_{14} + \text{H}_2$ |                   |                   |
|--------------------------------------------|-------------------|-------------------|-----------------------------------------------------|-------------------|-------------------|-----------------------------------------------------------|-------------------|-------------------|
| E                                          | -248,4092007      |                   |                                                     | -248,37501        |                   |                                                           | -248.43450178     |                   |
| H                                          | -248,2034667      |                   |                                                     | -248,1777712      |                   |                                                           | -248.23417146     |                   |
| G                                          | -248,25242        |                   |                                                     | -248,2261315      |                   |                                                           | -248.28262085     |                   |
| E                                          | -248,7570143      |                   |                                                     | -248,7228562      |                   |                                                           | -248.78438156     |                   |
| H                                          | 3.90244901624217  | 9.42504815708469  | H                                                   | 0.80170974429476  | -0.58938294659471 | H                                                         | 3.33113309198864  | 10.46453928912834 |
| 10.04906651434456                          |                   |                   | 0.92112336173798                                    |                   |                   | 9.56444211326653                                          |                   |                   |
| H                                          | 6.83353381108372  | 12.91820843573510 | H                                                   | 2.66969558973920  | -0.70433922319661 | H                                                         | 5.02572135591715  | 9.88106982686070  |
| 9.73238715788029                           |                   |                   | 0.78167122769226                                    |                   |                   | 11.00317297272730                                         |                   |                   |
| H                                          | 4.43719534906216  | 11.69986703130003 | H                                                   | 0.36495594143596  | 1.86894382787090  | H                                                         | 3.84762900907083  | 12.88688025383359 |
| 9.00119983920167                           |                   |                   | 0.43906370692944                                    |                   |                   | 9.07733965028903                                          |                   |                   |
| N                                          | 3.35862674414461  | 10.22123538619771 | N                                                   | 0.00846434717645  | 0.05845216322118  | N                                                         | 2.69579559798272  | 11.13627610950967 |
| 10.38092877505048                          |                   |                   | 0.95595287658311                                    |                   |                   | 10.00054716362470                                         |                   |                   |
| H                                          | 2.08664145131618  | 10.34421890053314 | H                                                   | -0.46661747709990 | -0.45576680629441 | H                                                         | 1.60845648636007  | 11.68106625038090 |
| 8.45810330345879                           |                   |                   | 1.23733567211541                                    |                   |                   | 8.05540244641130                                          |                   |                   |
| H                                          | 3.22180904508244  | 10.04317038224818 | H                                                   | -0.41729221181681 | -0.01334737771859 | H                                                         | 2.49963888331001  | 10.74498040627554 |
| 11.37568405931101                          |                   |                   | 1.87670189060266                                    |                   |                   | 10.92350538263724                                         |                   |                   |
| B                                          | 4.20224212731816  | 11.56612718028035 | B                                                   | 0.58122003140657  | 1.57117577845870  | B                                                         | 3.51259161818743  | 12.49774016115045 |
| 10.18623053147915                          |                   |                   | 0.72123857557494                                    |                   |                   | 10.17790436497004                                         |                   |                   |
| B                                          | 6.55213280741590  | 12.71639843934119 | B                                                   | 2.97933120513288  | 0.36151179986559  | B                                                         | 5.65843982182757  | 10.86344232062214 |
| 10.90468983874320                          |                   |                   | 0.25811913111074                                    |                   |                   | 10.63727985825128                                         |                   |                   |
| B                                          | 1.9392706092242   | 10.20317854563982 | B                                                   | -0.94353633117531 | -0.10910243011772 | B                                                         | 1.36893817199600  | 11.28740801966533 |
| 9.66256757334818                           |                   |                   | 0.20385095468940                                    |                   |                   | 9.17325291368432                                          |                   |                   |
| H                                          | 1.40424007204310  | 9.10583082681292  | H                                                   | -1.49265637421284 | -1.68457994034317 | H                                                         | 3.48359085994021  | 7.92991002197611  |
| 9.88380960719910                           |                   |                   | 0.39895354380707                                    |                   |                   | 9.88980668229961                                          |                   |                   |
| H                                          | 7.56276675279290  | 12.45915048747947 | H                                                   | 4.16824500072783  | 0.57030839062130  | H                                                         | 6.73919742229469  | 10.89951332418051 |
| 11.55101467613406                          |                   |                   | 0.43956561509864                                    |                   |                   | 11.20954289014780                                         |                   |                   |
| N                                          | 5.56960451671451  | 11.43711896889493 | N                                                   | 2.13623029173253  | 1.54375508330920  | N                                                         | 4.81971458964296  | 12.18469419893546 |
| 10.97525341642985                          |                   |                   | 0.96807802207883                                    |                   |                   | 11.02628277852379                                         |                   |                   |
| H                                          | 6.09013476343527  | 10.62675613008629 | H                                                   | 2.33890850007003  | 1.54463056086151  | H                                                         | 4.60121352721698  | 12.15291522456638 |
| 10.64128772462874                          |                   |                   | 1.96733462842189                                    |                   |                   | 12.02103156725538                                         |                   |                   |
| H                                          | 5.96807450372491  | 13.67664017222668 | H                                                   | 2.69610438759599  | 0.35743408948199  | H                                                         | 5.80706285350062  | 10.84941951855814 |
| 11.38440241473068                          |                   |                   | 0.92804788099191                                    |                   |                   | 9.42243569715587                                          |                   |                   |
| H                                          | 3.56066563888645  | 12.48763495472371 | H                                                   | 0.00579516741906  | 2.30510966664070  | H                                                         | 2.80830056613616  | 13.29993025663493 |
| 10.65131369665503                          |                   |                   | 1.49538594886243                                    |                   |                   | 10.76433177874059                                         |                   |                   |
| H                                          | 1.23545113672535  | 11.09142464973338 | H                                                   | -1.96854284261449 | 0.49577010842976  | H                                                         | 0.57012404565763  | 11.97005305809256 |
| 10.11752298391511                          |                   |                   | 0.14690711616890                                    |                   |                   | 9.77256642902258                                          |                   |                   |
| H                                          | 5.38796126729011  | 11.23812726099694 | H                                                   | 2.50422044235709  | 2.43460208115741  | H                                                         | 5.43257301727170  | 12.99249149886208 |
| 11.95850258491732                          |                   |                   | 0.63870427237763                                    |                   |                   | 10.93386988021092                                         |                   |                   |
| H                                          | 0.03017525741386  | 9.41187502392585  | H                                                   | -1.97107733977835 | -1.68635946701670 | H                                                         | 2.96846927381031  | 7.43417532233740  |
| 8.99311863252098                           |                   |                   | 0.21018432273963                                    |                   |                   | 9.68509172992716                                          |                   |                   |
| N                                          | -0.84655043457016 | 9.62021124500224  | N                                                   | -3.32481367679018 | -1.94571655131046 | N                                                         | 0.70770447481291  | 9.81174262907880  |
| 8.47317357925754                           |                   |                   | 1.83094216696788                                    |                   |                   | 9.02105091951508                                          |                   |                   |
| H                                          | -0.98311320521337 | 8.93077090534359  | H                                                   | -2.99674476800290 | -2.63566492277144 | H                                                         | 1.30222300827910  | 9.15396018162515  |
| 7.73492188634211                           |                   |                   | 2.49923875749211                                    |                   |                   | 8.51678164259233                                          |                   |                   |
| H                                          | -0.77111209349771 | 10.54927092937775 | H                                                   | -3.40156928586551 | -1.07181182499489 | H                                                         | -0.16479473110288 | 9.87145307464581  |
| 8.05982943839386                           |                   |                   | 2.34151699858190                                    |                   |                   | 8.49817611963089                                          |                   |                   |
| H                                          | -1.63920585683336 | 9.59758391303486  | H                                                   | -4.27203034173204 | -2.21562205955953 | H                                                         | 0.47927038729829  | 9.37618697907695  |
| 9.11384164655721                           |                   |                   | 1.58574151727162                                    |                   |                   | 9.91503489951346                                          |                   |                   |

## 2. Decomposition of $\text{NH}_4^+\text{-BH}_4^-$ into $\text{NH}_3\text{BH}_3$ and $\text{H}_2$ in THF

$\Delta\Delta G^* = 58 \text{ kJ mol}^{-1}$  (14 kcal mol<sup>-1</sup>)

| Substrates: $\text{NH}_4^+\text{-BH}_4^-$ |                     |                  | Transition state; $\nu_{\text{im}} = -192 \text{ cm}^{-1}$ |                   |                     | Product: $\text{NH}_3\text{BH}_3+\text{H}_2$ |                   |                   |
|-------------------------------------------|---------------------|------------------|------------------------------------------------------------|-------------------|---------------------|----------------------------------------------|-------------------|-------------------|
| <b>E</b>                                  | <b>-84,34346903</b> |                  | <b>-84,30381255</b>                                        |                   | <b>-84.36551277</b> |                                              |                   |                   |
| <b>H</b>                                  | <b>-84,2516124</b>  |                  | <b>-84,21922254</b>                                        |                   | <b>-84.27782184</b> |                                              |                   |                   |
| <b>G</b>                                  | <b>-84,283986</b>   |                  | <b>-84,25915181</b>                                        |                   | <b>-84.31102158</b> |                                              |                   |                   |
| <b>E</b>                                  | <b>-84,47225417</b> |                  | <b>-84,43542144</b>                                        |                   | <b>-84.49696412</b> |                                              |                   |                   |
| B                                         | -4.82982252170536   | 1.72053779034281 | B                                                          | -1.50287303418764 | 0.63876813464282    | B                                            | -3.98602337625892 | 2.38548091238253  |
| 0.02367363739606                          |                     |                  | 0.44569224703493                                           |                   |                     | 0.70841812911015                             |                   |                   |
| N                                         | -1.77367358139469   | 1.45242795552326 | N                                                          | 1.67096820610126  | -0.11608199448868   | N                                            | -2.51079344393880 | 1.86489815834672  |
| 0.01414769812632                          |                     |                  | 0.13044477456475                                           |                   |                     | 0.25450034458934                             |                   |                   |
| H                                         | -4.45397488619308   | 2.87264765918443 | H                                                          | -0.83238957131596 | 1.55369006602716    | H                                            | -3.85675245842353 | 3.53856657893541  |
| 0.17619394703757                          |                     |                  | 0.08036684171849                                           |                   |                     | 1.07580410577538                             |                   |                   |
| H                                         | -4.55519637579775   | 1.38472415937971 | H                                                          | -1.22784572791200 | 0.05935014085067    | H                                            | -4.35417639142868 | 1.65869397734892  |
| 1.17295743090450                          |                     |                  | 1.44994762688896                                           |                   |                     | 1.61284039523883                             |                   |                   |
| H                                         | -4.25235789710763   | 0.96441599040701 | H                                                          | -1.06496706453873 | -1.52511621206970   | H                                            | -3.85295516368822 | -0.63689270861993 |
| 0.77283311497087                          |                     |                  | 1.52727501597430                                           |                   |                     | 1.69803943331986                             |                   |                   |
| H                                         | -6.02965143542113   | 1.61290340024765 | H                                                          | -2.48352228729422 | 0.34162613383935    | H                                            | -4.70773376077587 | 2.29773626490969  |
| 0.17909899434801                          |                     |                  | 0.16220977007508                                           |                   |                     | 0.26737675717421                             |                   |                   |
| H                                         | -1.29474234440937   | 0.55767880628941 | H                                                          | 2.58988863001572  | -0.54781171926806   | H                                            | -2.52845718183990 | 0.89694632011587  |
| 0.07770920647177                          |                     |                  | 0.11238143578636                                           |                   |                     | 0.05955104624972                             |                   |                   |
| H                                         | -1.35058478382702   | 1.98878864032109 | H                                                          | 1.75573313094210  | 0.74428319630006    | H                                            | -2.12916987739779 | 2.41384498897070  |
| 0.77020211262428                          |                     |                  | 0.40121193505143                                           |                   |                     | 0.51299544552452                             |                   |                   |
| H                                         | -1.68565617843929   | 1.97352767555258 | H                                                          | 1.51315884032439  | 0.16792692146426    | H                                            | -1.83480908027833 | 1.91448540590981  |
| 0.85709379486076                          |                     |                  | 1.09195828901368                                           |                   |                     | 1.01379819684301                             |                   |                   |
| H                                         | -2.79574901200452   | 1.29909030865197 | H                                                          | -0.41815112213492 | -1.31663466729790   | H                                            | -3.26053828226938 | -0.50701751240000 |
| 0.21895774962602                          |                     |                  | 1.22009449390636                                           |                   |                     | 2.12739803638837                             |                   |                   |

### 3. Complexation of $\text{NH}_4^+$ with $\text{B}_3\text{N}_3\text{H}_{14}$ in THF:

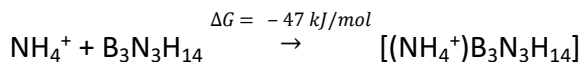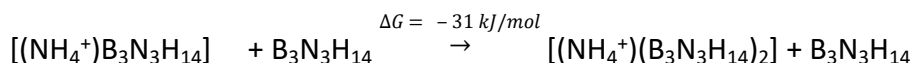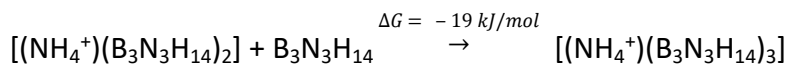

| $\text{NH}_4^+$   |                   | $\text{B}_3\text{N}_3\text{H}_{14}$ |                   | $(\text{NH}_4^+)(\text{B}_3\text{N}_3\text{H}_{14})$ |                   |
|-------------------|-------------------|-------------------------------------|-------------------|------------------------------------------------------|-------------------|
| <b>E</b>          | -56,99274527      |                                     | -247,2442444      |                                                      | -304,2698601      |
| <b>H</b>          | -56,9393111       |                                     | -247,0574479      |                                                      | -304,0284483      |
| <b>G</b>          | -56,9627515       |                                     | -247,0989134      |                                                      | -304,0796272      |
| B                 | -1.39495813257824 | 0.33929967056958                    | B                 | -1.39495813257824                                    | 0.33929967056958  |
| 1.06916287991551  |                   |                                     | 1.06916287991551  |                                                      |                   |
| N                 | -2.20445880584144 | -0.36321058405875                   | N                 | -2.20445880584144                                    | -0.36321058405875 |
| 0.14819201267700  |                   |                                     | 0.14819201267700  |                                                      |                   |
| B                 | -1.59042905375964 | -1.64827802036495                   | B                 | -1.59042905375964                                    | -1.64827802036495 |
| 0.85488220886687  |                   |                                     | 0.85488220886687  |                                                      |                   |
| H                 | -2.42459402852973 | 0.34918195621964                    | H                 | -2.42459402852973                                    | 0.34918195621964  |
| 0.84294611821610  |                   |                                     | 0.84294611821610  |                                                      |                   |
| H                 | -3.11305065794379 | -0.63800421413397                   | H                 | -3.11305065794379                                    | -0.63800421413397 |
| 0.21929251238882  |                   |                                     | 0.21929251238882  |                                                      |                   |
| N                 | -0.06459922819024 | -1.30058957981328                   | N                 | -0.06459922819024                                    | -1.30058957981328 |
| 1.26023756554426  |                   |                                     | 1.26023756554426  |                                                      |                   |
| H                 | -2.21175721956632 | -1.91226478803726                   | H                 | -2.21175721956632                                    | -1.91226478803726 |
| 1.86369199693538  |                   |                                     | 1.86369199693538  |                                                      |                   |
| H                 | -1.61411457062865 | -2.57031270870798                   | H                 | -1.61411457062865                                    | -2.57031270870798 |
| 0.06271490095861  |                   |                                     | 0.06271490095861  |                                                      |                   |
| B                 | 1.10830352290340  | -2.09705479656034                   | B                 | 1.10830352290340                                     | -2.09705479656034 |
| 0.54727018566218  |                   |                                     | 0.54727018566218  |                                                      |                   |
| H                 | 0.09168472465526  | -0.30132058673718                   | H                 | 0.09168472465526                                     | -0.30132058673718 |
| 1.11357154655471  |                   |                                     | 1.11357154655471  |                                                      |                   |
| H                 | 0.04509184170150  | -1.44980278699727                   | H                 | 0.04509184170150                                     | -1.44980278699727 |
| 2.25974628123964  |                   |                                     | 2.25974628123964  |                                                      |                   |
| N                 | 0.79935921599377  | -2.03432455998856                   | N                 | 0.79935921599377                                     | -2.03432455998856 |
| 1.03698691841691  |                   |                                     | 1.03698691841691  |                                                      |                   |
| H                 | 2.17293231747920  | -1.54970286550128                   | H                 | 2.17293231747920                                     | -1.54970286550128 |
| 0.73099839281503  |                   |                                     | 0.73099839281503  |                                                      |                   |
| H                 | 1.08618816022553  | -3.25721650284473                   | H                 | 1.08618816022553                                     | -3.25721650284473 |
| 0.880846464593162 |                   |                                     | 0.880846464593162 |                                                      |                   |
| H                 | 0.61101004728679  | -1.07863093837470                   | H                 | 0.61101004728679                                     | -1.07863093837470 |
| 1.36145786307852  |                   |                                     | 1.36145786307852  |                                                      |                   |
| H                 | 1.57173493962069  | -2.42246771972654                   | H                 | 1.57173493962069                                     | -2.42246771972654 |
| 1.57133490317869  |                   |                                     | 1.57133490317869  |                                                      |                   |
| H                 | -0.04928905465051 | -2.55720839413654                   | H                 | -0.04928905465051                                    | -2.55720839413654 |
| 1.25768150201177  |                   |                                     | 1.25768150201177  |                                                      |                   |
| H                 | -0.28111522606123 | 0.66358422953666                    | H                 | -0.28111522606123                                    | 0.66358422953666  |
| 0.65998116432115  |                   |                                     | 0.65998116432115  |                                                      |                   |
| H                 | -1.31868792080042 | -0.47796636605897                   | H                 | -1.31868792080042                                    | -0.47796636605897 |
| 1.97406236201134  |                   |                                     | 1.97406236201134  |                                                      |                   |
| H                 | -2.00211658561593 | 1.32831350371642                    | H                 | -2.00211658561593                                    | 1.32831350371642  |
| 1.42039218717870  |                   |                                     | 1.42039218717870  |                                                      |                   |
| B                 | -3.21977651162233 | 0.85698108237180                    | B                 | -3.21977651162233                                    | 0.85698108237180  |
| 0.27308569725256  |                   |                                     | 0.27308569725256  |                                                      |                   |
| N                 | -1.66893806115107 | 0.62845162102579                    | N                 | -1.66893806115107                                    | 0.62845162102579  |
| 0.63072146820986  |                   |                                     | 0.63072146820986  |                                                      |                   |
| B                 | -1.22135497078232 | -0.87641467692306                   | B                 | -1.22135497078232                                    | -0.87641467692306 |
| 0.72255129427725  |                   |                                     | 0.72255129427725  |                                                      |                   |
| H                 | -1.10626921505391 | 1.12098785937935                    | H                 | -1.10626921505391                                    | 1.12098785937935  |
| 0.06203637374238  |                   |                                     | 0.06203637374238  |                                                      |                   |
| H                 | -1.47643446617394 | 1.11402250507021                    | H                 | -1.47643446617394                                    | 1.11402250507021  |
| 1.50703374934660  |                   |                                     | 1.50703374934660  |                                                      |                   |
| N                 | 0.33749177660046  | -0.96859107958974                   | N                 | 0.33749177660046                                     | -0.96859107958974 |
| 1.11226174481475  |                   |                                     | 1.11226174481475  |                                                      |                   |
| H                 | -1.86416002898519 | -1.43228023661467                   | H                 | -1.86416002898519                                    | -1.43228023661467 |
| 1.59823427617944  |                   |                                     | 1.59823427617944  |                                                      |                   |
| H                 | -1.36187114516945 | -1.40716194741124                   | H                 | -1.36187114516945                                    | -1.40716194741124 |
| 0.36253491174973  |                   |                                     | 0.36253491174973  |                                                      |                   |
| B                 | 1.32095076580676  | -0.20995473369159                   | B                 | 1.32095076580676                                     | -0.20995473369159 |
| 0.14019937475252  |                   |                                     | 0.14019937475252  |                                                      |                   |
| H                 | 0.46115017022099  | -0.65613878675463                   | H                 | 0.46115017022099                                     | -0.65613878675463 |
| 2.07674620883883  |                   |                                     | 2.07674620883883  |                                                      |                   |
| H                 | 0.556942848484783 | -1.96517601659965                   | H                 | 0.556942848484783                                    | -1.96517601659965 |
| 1.13566195946173  |                   |                                     | 1.13566195946173  |                                                      |                   |
| N                 | 2.83902470620326  | -0.55219074176528                   | N                 | 2.83902470620326                                     | -0.55219074176528 |
| 0.58093842560065  |                   |                                     | 0.58093842560065  |                                                      |                   |
| H                 | 1.17263846843348  | -0.61221966628137                   | H                 | 1.17263846843348                                     | -0.61221966628137 |
| 0.99014988340315  |                   |                                     | 0.99014988340315  |                                                      |                   |
| H                 | 1.18657880105997  | 0.98698169153638                    | H                 | 1.18657880105997                                     | 0.98698169153638  |
| 0.25440268250575  |                   |                                     | 0.25440268250575  |                                                      |                   |
| H                 | 3.06568043885840  | -1.54479368479119                   | H                 | 3.06568043885840                                     | -1.54479368479119 |
| 0.51739517720339  |                   |                                     | 0.51739517720339  |                                                      |                   |
| H                 | 3.49739240107152  | -0.07026605038333                   | H                 | 3.49739240107152                                     | -0.07026605038333 |
| 0.03028309752868  |                   |                                     | 0.03028309752868  |                                                      |                   |
| H                 | 3.06199852597102  | -0.25593704344891                   | H                 | 3.06199852597102                                     | -0.25593704344891 |
| 1.53111251277506  |                   |                                     | 1.53111251277506  |                                                      |                   |
| H                 | -3.43171846380942 | 0.33658371613133                    | H                 | -3.43171846380942                                    | 0.33658371613133  |
| 0.82187866171214  |                   |                                     | 0.82187866171214  |                                                      |                   |
| H                 | -3.89897346060714 | 0.33851958620337                    | H                 | -3.89897346060714                                    | 0.33851958620337  |
| 1.14504074546465  |                   |                                     | 1.14504074546465  |                                                      |                   |
| H                 | -3.44547790769362 | 2.05108955515805                    | H                 | -3.44547790769362                                    | 2.05108955515805  |
| 0.19294875098966  |                   |                                     | 0.19294875098966  |                                                      |                   |
| N                 | -4.19853954399310 | -2.19938696994099                   | N                 | -4.19853954399310                                    | -2.19938696994099 |
| 0.20783894429267  |                   |                                     | 0.20783894429267  |                                                      |                   |
| H                 | -3.52529722070539 | -2.50246500814299                   | H                 | -3.52529722070539                                    | -2.50246500814299 |
| 0.49781445334120  |                   |                                     | 0.49781445334120  |                                                      |                   |
| H                 | -3.96879100404545 | -1.21767942521280                   | H                 | -3.96879100404545                                    | -1.21767942521280 |
| 0.46170043759037  |                   |                                     | 0.46170043759037  |                                                      |                   |
| H                 | -4.13204870820608 | -2.80368861437980                   | H                 | -4.13204870820608                                    | -2.80368861437980 |
| 1.02616914480727  |                   |                                     | 1.02616914480727  |                                                      |                   |
| H                 | -5.14203701337525 | -2.24475228004498                   | H                 | -5.14203701337525                                    | -2.24475228004498 |
| 0.17578091901243  |                   |                                     | 0.17578091901243  |                                                      |                   |

| [(NH <sub>4</sub> <sup>+</sup> )(B <sub>3</sub> N <sub>3</sub> H <sub>14</sub> ) <sub>2</sub> ] |                   |                   | [(NH <sub>4</sub> <sup>+</sup> )(B <sub>3</sub> N <sub>3</sub> H <sub>14</sub> ) <sub>3</sub> ] |                    |                   |
|-------------------------------------------------------------------------------------------------|-------------------|-------------------|-------------------------------------------------------------------------------------------------|--------------------|-------------------|
| E                                                                                               | -551,5445856      |                   | -798,8162026                                                                                    |                    |                   |
| H                                                                                               | -551,1147622      |                   | -798,1981365                                                                                    |                    |                   |
| G                                                                                               | -551,1904521      |                   | -798,2966141                                                                                    |                    |                   |
| B                                                                                               | -3.11986004524949 | 0.76215573551633  | B                                                                                               | -2.74981161074899  | 1.13506870533074  |
|                                                                                                 | 0.02687135332424  |                   |                                                                                                 | 0.04989699084143   |                   |
| N                                                                                               | -1.64743872392956 | 0.89634785510820  | N                                                                                               | -1.34940611630615  | 1.07385926380832  |
|                                                                                                 | 0.60709391730230  |                   |                                                                                                 | 0.84182842466040   |                   |
| B                                                                                               | -0.95432825071799 | -0.48071330127820 | B                                                                                               | -0.81061774660508  | -0.38639732420989 |
|                                                                                                 | 0.91732745999767  |                   |                                                                                                 | 1.06315796339265   |                   |
| H                                                                                               | -1.06995608330084 | 1.44650845815148  | H                                                                                               | -0.66650792187929  | 1.62932486290522  |
|                                                                                                 | 0.02712533281041  |                   |                                                                                                 | 0.32858165747400   |                   |
| H                                                                                               | -1.71873901349812 | 1.46728560692289  | H                                                                                               | -1.46284531086275  | 1.56116119744841  |
|                                                                                                 | 1.44947723228699  |                   |                                                                                                 | 1.73063652499563   |                   |
| N                                                                                               | 0.47033775294366  | -0.24051847493337 | N                                                                                               | 0.57675001228961   | -0.35153357885946 |
|                                                                                                 | 1.63260493716679  |                   |                                                                                                 | 1.88714862241926   |                   |
| H                                                                                               | -1.65428349734687 | -1.11751677623843 | H                                                                                               | -1.61984288398251  | -1.01781398327157 |
|                                                                                                 | 1.68472030162008  |                   |                                                                                                 | 1.71889096085587   |                   |
| H                                                                                               | -0.75053890243271 | -1.07106283611923 | H                                                                                               | -0.58374997293807  | -0.89816420680780 |
|                                                                                                 | 0.12435636386542  |                   |                                                                                                 | 0.01373223090375   |                   |
| B                                                                                               | 1.48818526612186  | 0.65818911686037  | B                                                                                               | 1.72666993876936   | 0.50228871997024  |
|                                                                                                 | 0.83582363840581  |                   |                                                                                                 | 1.23461000889558   |                   |
| H                                                                                               | 0.31133548030767  | 0.12699928158070  | H                                                                                               | 0.38889378217410   | -0.04797714095678 |
|                                                                                                 | 2.57210030911344  |                   |                                                                                                 | 2.84396296812920   |                   |
| H                                                                                               | 0.85741975382638  | -1.17298510341005 | H                                                                                               | 0.86026420651351   | -1.32832245788036 |
|                                                                                                 | 1.78399405827553  |                   |                                                                                                 | 1.97737864644006   |                   |
| N                                                                                               | 2.88966489630694  | 0.68060433037163  | N                                                                                               | 3.07637081888178   | 0.29208201758057  |
|                                                                                                 | 1.64646543644201  |                   |                                                                                                 | 2.10588302835937   |                   |
| H                                                                                               | 1.70601359493412  | 0.17279780900042  | H                                                                                               | 1.95523360987935   | 0.10359152059523  |
|                                                                                                 | 0.24979372499201  |                   |                                                                                                 | 0.11646842723494   |                   |
| H                                                                                               | 1.09712992782956  | 1.80254757333990  | H                                                                                               | 1.46129000554976   | 1.68212480835814  |
|                                                                                                 | 0.78917772689553  |                   |                                                                                                 | 1.28757635690962   |                   |
| H                                                                                               | 3.31589152690344  | -0.24107763898463 | H                                                                                               | 3.39478899054453   | -0.67669817060800 |
|                                                                                                 | 1.74393456504465  |                   |                                                                                                 | 2.12848472101265   |                   |
| H                                                                                               | 3.56994428777303  | 1.26116133692236  | H                                                                                               | 3.84011466320670   | 0.83599593678631  |
|                                                                                                 | 1.15734733146355  |                   |                                                                                                 | 1.70614543593611   |                   |
| H                                                                                               | 2.80549315901031  | 1.06904083233800  | H                                                                                               | 2.98442256517201   | 0.59733059377464  |
|                                                                                                 | 2.58588646998912  |                   |                                                                                                 | 3.07479171446153   |                   |
| H                                                                                               | -3.03063062003186 | 0.07694016713273  | H                                                                                               | -2.59259312758043  | 0.56489389994200  |
|                                                                                                 | 1.04345203659699  |                   |                                                                                                 | 1.02455815577740   |                   |
| H                                                                                               | -3.84589878907643 | 0.23149787460825  | H                                                                                               | -3.59843979733198  | 0.57430268956494  |
|                                                                                                 | 0.79955434831813  |                   |                                                                                                 | 0.72731733767542   |                   |
| H                                                                                               | -3.53746828831985 | 1.86909100803453  | H                                                                                               | -3.05426555517580  | 2.30119239584373  |
|                                                                                                 | 0.32244897280417  |                   |                                                                                                 | 0.14326192690213   |                   |
| N                                                                                               | -3.45593303413246 | -2.55143517266849 | N                                                                                               | -3.40436137351559  | -2.13644120425613 |
|                                                                                                 | 0.14033883064426  |                   |                                                                                                 | 0.50669335442596   |                   |
| H                                                                                               | -2.55697076655568 | -3.01909366809907 | H                                                                                               | -2.57728458146402  | -2.73513126376488 |
|                                                                                                 | 0.06056447026998  |                   |                                                                                                 | 0.37275235591159   |                   |
| H                                                                                               | -3.30673228405240 | -1.56067303199716 | H                                                                                               | -3.13644860029184  | -1.14046752519274 |
|                                                                                                 | 0.39738395926921  |                   |                                                                                                 | 0.54337673378521   |                   |
| H                                                                                               | -3.90968257808262 | -3.05656578803449 | H                                                                                               | -3.89997429792008  | -2.38875096047791 |
|                                                                                                 | 0.90168217107346  |                   |                                                                                                 | 1.37254631816984   |                   |
| H                                                                                               | -4.04476736850209 | -2.59270181168214 | H                                                                                               | -4.04702563559814  | -2.27203497061428 |
|                                                                                                 | 0.69019012531722  |                   |                                                                                                 | 0.27312186273353   |                   |
| H                                                                                               | -3.82192485569185 | -5.32746364953546 | H                                                                                               | -3.81008640524010  | -4.99808027688050 |
|                                                                                                 | 1.24450761520394  |                   |                                                                                                 | 1.43413181206637   |                   |
| H                                                                                               | -2.46847979736275 | -5.01104751883461 | H                                                                                               | -2.46627212068912  | -4.68273947132610 |
|                                                                                                 | 1.11916305394685  |                   |                                                                                                 | 0.87693890578797   |                   |
| H                                                                                               | -3.41629846923204 | -7.31979296141109 | H                                                                                               | -3.52263629591118  | -7.00153312302894 |
|                                                                                                 | 2.68133610226729  |                   |                                                                                                 | 2.88477998027164   |                   |
| H                                                                                               | -1.94876724554137 | -6.93734048169796 | H                                                                                               | -2.00302555857182  | -6.67871063104786 |
|                                                                                                 | 0.49177651996570  |                   |                                                                                                 | 0.67837108099437   |                   |
| B                                                                                               | -2.75212938380756 | -5.44313235101093 | B                                                                                               | -2.75469234431700  | -5.16300558872806 |
|                                                                                                 | 1.81800461056669  |                   |                                                                                                 | 2.01624256438472   |                   |
| N                                                                                               | -2.95776717956341 | -6.47890574909142 | N                                                                                               | -3.01619508975010  | -6.18712228916998 |
|                                                                                                 | 3.03633932452669  |                   |                                                                                                 | 3.23563856844959   |                   |
| H                                                                                               | -3.65171776246029 | -6.04848564629801 | H                                                                                               | -3.68458287872029  | -5.71051183697072 |
|                                                                                                 | 3.64894436091237  |                   |                                                                                                 | 3.84278135751539   |                   |
| B                                                                                               | -1.42379955279695 | -5.09634391840186 | B                                                                                               | -1.418884981600118 | -4.82631048042547 |
|                                                                                                 | 0.49231844757904  |                   |                                                                                                 | 0.26476025904556   |                   |
| N                                                                                               | -1.68392455755169 | -6.00518496314754 | N                                                                                               | -1.70356317503137  | -5.76322874828479 |
|                                                                                                 | 0.81059307599722  |                   |                                                                                                 | 1.01359192510141   |                   |
| H                                                                                               | -0.55217074105882 | -5.61356081152254 | H                                                                                               | -0.57335403663875  | -5.35490918828134 |
|                                                                                                 | 1.17163746817266  |                   |                                                                                                 | 0.97075549683143   |                   |
| H                                                                                               | -2.52547206719916 | -8.65827825841582 | H                                                                                               | -2.71628367952942  | -8.34801825953255 |
|                                                                                                 | 4.80551620997253  |                   |                                                                                                 | 5.06246571754249   |                   |
| H                                                                                               | -2.35669341075630 | -4.39334375164554 | H                                                                                               | -2.31801520910738  | -4.13414185268946 |

|                     |                     |                      |                     |
|---------------------|---------------------|----------------------|---------------------|
| 2.28589791889604    |                     | 2.49211351480559     |                     |
| H -1.04287242437314 | -3.99147398816093 - | H -0.99875633728959  | -3.75020407225487   |
| 0.11415438400579    |                     | 0.14721930785591     |                     |
| H -0.79313574210667 | -6.14293184221405   | H -0.81898062998760  | -5.93950733225117   |
| 1.28627891446148    |                     | 1.48781885307113     |                     |
| N -2.07520983715054 | -7.78824193218884   | N -2.21748039953372  | -7.49663483182302   |
| 5.09079019380927    |                     | 5.32151034200395     |                     |
| B -1.65577389126226 | -6.84239116581788   | B -1.73874971700232  | -6.61860825098380   |
| 3.84586197545988    |                     | 4.04716334847625     |                     |
| H -2.70328681150698 | -7.33322572295090   | H -2.82196839827921  | -6.98267750923446   |
| 5.75332094676226    |                     | 5.96286312100030     |                     |
| H -0.89859885484810 | -7.49109144329099   | H -1.03283448147575  | -7.33842487583590   |
| 3.15990329694254    |                     | 3.37678118669928     |                     |
| H -1.24659939125443 | -8.05548721831688   | H -1.40887868247612  | -7.79272142807358   |
| 5.62109895866372    |                     | 5.86693476910004     |                     |
| H -1.16051292990348 | -5.83916324548888   | H -1.17053704595792  | -5.64147981190702   |
| 4.30372780502526    |                     | 4.47604367237351     |                     |
|                     |                     | H -5.13740420451449  | -2.80824886504039   |
|                     |                     | 2.74056852419030     |                     |
|                     |                     | H -6.11446342232350  | -3.53278884667645   |
|                     |                     | 0.31514530084987     |                     |
|                     |                     | B -5.90126918534716  | -1.84758834821190   |
|                     |                     | 2.75927419589252     |                     |
|                     |                     | H -7.68059612905569  | -2.97327718259136   |
|                     |                     | 2.28150627733491     |                     |
|                     |                     | H -8.57714974848525  | -3.79399619215984 - |
|                     |                     | 0.06183326675459     |                     |
|                     |                     | B -6.84095363776522  | -2.55542872736697   |
|                     |                     | 0.34438950948201     |                     |
|                     |                     | H -6.28273634409661  | -1.64663970002707   |
|                     |                     | 3.90214453335991     |                     |
|                     |                     | N -7.17570486272842  | -2.20499444496955   |
|                     |                     | 1.83987345291339     |                     |
|                     |                     | H -7.90257766667606  | -3.17502996978521 - |
|                     |                     | 1.39241941720272     |                     |
|                     |                     | N -8.19720622167069  | -2.92734977357646 - |
|                     |                     | 0.44727410212904     |                     |
|                     |                     | H -5.36537056600805  | -0.85245632484656   |
|                     |                     | 2.29780838547558     |                     |
|                     |                     | H -6.34752394340042  | -1.58851122878829 - |
|                     |                     | 0.20186625243433     |                     |
|                     |                     | H -7.82216095844643  | -1.41808169367191   |
|                     |                     | 1.88021372791635     |                     |
|                     |                     | H -10.97588824126134 | -3.16602914209636 - |
|                     |                     | 1.02037649484354     |                     |
|                     |                     | B -9.29305779154673  | -1.79719865074552 - |
|                     |                     | 0.49304922415965     |                     |
|                     |                     | H -9.73710725461541  | -1.58952701757240   |
|                     |                     | 0.61349924408549     |                     |
|                     |                     | N -10.52988722258301 | -2.32846759051453 - |
|                     |                     | 1.39546025808854     |                     |
|                     |                     | H -10.26548173713014 | -2.53901891352129 - |
|                     |                     | 2.35811410777236     |                     |
|                     |                     | H -8.84889193316731  | -0.81207066927045 - |
|                     |                     | 1.03384562336816     |                     |
|                     |                     | H -11.25703022974726 | -1.61600716014585 - |
|                     |                     | 1.44735467844314     |                     |







|                     |                   |   |                     |                   |   |                     |                   |   |
|---------------------|-------------------|---|---------------------|-------------------|---|---------------------|-------------------|---|
| 5.22157467557784    |                   |   | 3.07783866514610    |                   |   | 3.83898227237947    |                   |   |
| H -6.96226201463519 | -3.41128590407633 | - | H -1.69333711161359 | -3.22392646232934 | - | H -5.97249543001921 | -3.21556352408381 | - |
| 4.12176369941528    |                   |   | 2.80958681859341    |                   |   | 3.14767814507552    |                   |   |
| H -6.35142528707451 | -0.95930807812568 | - | H -0.37042604105596 | -3.37326859774143 | - | H -5.57232851876223 | -0.22801784799885 | - |
| 5.98222451542640    |                   |   | 5.65156596617817    |                   |   | 4.01994756819247    |                   |   |
| B -6.35172444465070 | -2.38313432143847 | - | B -0.94567412074293 | -2.78513176896134 | - | B -5.52449054000253 | -2.10223786223792 | - |
| 4.35687543646739    |                   |   | 3.65586041393652    |                   |   | 2.93965571883580    |                   |   |
| H -8.60755635056070 | -0.56283021894363 | - | H -2.69392970169147 | -2.33938941223529 | - | H -8.07182690560947 | -0.57602842304007 | - |
| 4.81472656287485    |                   |   | 5.97739335689899    |                   |   | 3.49243412110827    |                   |   |
| N -4.80338287677326 | -2.71326440319982 | - | N 0.58660425812486  | -2.98666254089487 | - | N -3.93328496872300 | -2.22803975364388 | - |
| 4.41927733467855    |                   |   | 3.06553309497818    |                   |   | 2.90783770775522    |                   |   |
| H -4.73486530030004 | -4.55508965734203 | - | H 0.05949541935957  | -2.95950057009183 | - | H -3.96825571242119 | -4.22214453990551 | - |
| 3.03093568304795    |                   |   | 0.83286863301398    |                   |   | 1.73933168490171    |                   |   |
| H -4.27161204533088 | -1.85747347804267 | - | H 1.27880935911173  | -2.59710156943196 | - | H -3.49645277261708 | -1.30700222432812 | - |
| 4.57559666598130    |                   |   | 3.70624222431574    |                   |   | 2.80554369750814    |                   |   |
| B -4.26077632833148 | -3.43237833981028 | - | B 0.81826460767882  | -2.54834375979215 | - | B -3.22441228592620 | -3.29147538817247 | - |
| 3.09408702453409    |                   |   | 1.64976872065530    |                   |   | 1.94301526405673    |                   |   |
| H -3.03461644000549 | -3.48509356617226 | - | H 1.78057880311700  | -1.90607287771543 | - | H -2.18392765178568 | -3.63658532615937 | - |
| 3.12100436489471    |                   |   | 1.39264918773973    |                   |   | 2.46324193638247    |                   |   |
| H -6.51321977521847 | -1.53853442835827 | - | H -1.09861028289508 | -1.61087242559697 | - | H -5.94311746890761 | -1.60454101943400 | - |
| 3.49066042057411    |                   |   | 3.88962482684422    |                   |   | 1.91208996255461    |                   |   |
| H -4.63216393706986 | -2.76209094657814 | - | H -0.20992353310031 | -0.19226734744219 | - | H -5.21080190892674 | -1.17737105863830 | - |
| 2.13999463894711    |                   |   | 2.26354519341510    |                   |   | 0.13161202749128    |                   |   |

5. Dehydrogenation and cyclisation of B<sub>3</sub>N<sub>3</sub>H<sub>14</sub> in THF:

$$\Delta\Delta G^* = 178 \text{ kJ mol}^{-1} (42 \text{ kcal mol}^{-1})$$

| Substrates: B <sub>3</sub> N <sub>3</sub> H <sub>14</sub> |                     |                   | Transition state; $\nu_{\text{im}} = -204 \text{ cm}^{-1}$ |                   |                   | Product: B <sub>3</sub> N <sub>3</sub> H <sub>12</sub> + H <sub>2</sub> |                   |                   |
|-----------------------------------------------------------|---------------------|-------------------|------------------------------------------------------------|-------------------|-------------------|-------------------------------------------------------------------------|-------------------|-------------------|
| <b>E</b>                                                  | <b>-247,2662843</b> |                   | <b>- 247,1909889</b>                                       |                   |                   | <b>-247.2758594</b>                                                     |                   |                   |
| <b>H</b>                                                  | <b>-247,0800285</b> |                   | <b>-247,0140584</b>                                        |                   |                   | <b>-247.09599548</b>                                                    |                   |                   |
| <b>G</b>                                                  | <b>-247,122004</b>  |                   | <b>-247,056871</b>                                         |                   |                   | <b>-247.1401522</b>                                                     |                   |                   |
| <b>E</b>                                                  | <b>-247,6042227</b> |                   | <b>-247,5260112</b>                                        |                   |                   | <b>-247.615999430351</b>                                                |                   |                   |
| B                                                         | -1.54021257597342   | 0.33518671174295  | B                                                          | -1.48933548070614 | 1.69028293241534  | B                                                                       | -1.05546083732234 | -0.41491796481028 |
| 1.07577370926230                                          |                     |                   | 0.90952371791048                                           |                   |                   | 0.84291476154349                                                        |                   |                   |
| N                                                         | -2.24767204444348   | -0.33042947009478 | N                                                          | -1.85061940734333 | 0.92150461988765  | N                                                                       | -2.23684857660377 | -0.91969834364003 |
| 0.20922419342796                                          |                     |                   | 0.31643842195996                                           |                   |                   | 0.11330653157109                                                        |                   |                   |
| B                                                         | -1.57323874628140   | -1.62812148879007 | B                                                          | -0.93913373012405 | -0.47915801785037 | B                                                                       | -1.80421480810396 | -1.92209161250638 |
| 0.82251153718234                                          |                     |                   | 0.59589234652356                                           |                   |                   | 1.28561819864657                                                        |                   |                   |
| H                                                         | -2.36885303399078   | 0.37840621104163  | H                                                          | -1.79710832135936 | 1.48517055476195  | H                                                                       | -2.69636405569349 | -0.10002906118230 |
| 0.93273756662568                                          |                     |                   | 1.16522278719921                                           |                   |                   | 0.50417598451900                                                        |                   |                   |
| H                                                         | -3.20055415994328   | -0.58220939306202 | H                                                          | -2.80211009606767 | 0.55991781489787  | H                                                                       | -2.96033401902721 | -1.37634735397911 |
| 0.04784336455853                                          |                     |                   | 0.25633786656530                                           |                   |                   | 0.43780385624553                                                        |                   |                   |
| N                                                         | -0.05306778392926   | -1.27039042657532 | N                                                          | 0.48767158852963  | -0.05588078907379 | N                                                                       | -0.30373233495498 | -1.56140637107804 |
| 1.20802912397333                                          |                     |                   | 1.05889053135279                                           |                   |                   | 1.66317454603026                                                        |                   |                   |
| H                                                         | -2.16130522345302   | -1.97512119634289 | H                                                          | -1.51968856915579 | -1.05946462599117 | H                                                                       | -2.53519517305881 | -1.77642429940327 |
| 1.83132178985886                                          |                     |                   | 1.48427034984702                                           |                   |                   | 2.24736246474465                                                        |                   |                   |
| H                                                         | -1.59490616256961   | -2.50272191323365 | H                                                          | -0.93573380788072 | -1.07462538528650 | H                                                                       | -1.82745726278180 | -3.06065148394025 |
| 0.02462030764529                                          |                     |                   | 0.45178627304930                                           |                   |                   | 0.8572865209533                                                         |                   |                   |
| B                                                         | 1.08471963587744    | -2.16782663650063 | B                                                          | 1.64043202083740  | -1.18915138157626 | B                                                                       | 0.75196939449638  | -1.85385643859558 |
| 0.57211131460446                                          |                     |                   | 0.70463415973849                                           |                   |                   | 0.49921432702027                                                        |                   |                   |
| H                                                         | 0.13118542431796    | -0.29102437783617 | H                                                          | 0.81827190266837  | 0.80016205317940  | H                                                                       | -0.24282395674732 | -0.59079310583134 |
| 0.97948961602105                                          |                     |                   | 0.61449110767296                                           |                   |                   | 1.96914911118958                                                        |                   |                   |
| H                                                         | 0.05330732904628    | -1.32118846610820 | H                                                          | 0.50251634779866  | 0.13922908914621  | H                                                                       | -0.03854229702164 | -2.10426766553993 |
| 2.21877626243848                                          |                     |                   | 2.05815800567083                                           |                   |                   | 2.48205568866728                                                        |                   |                   |
| N                                                         | 0.95090690216052    | -2.02817310679335 | N                                                          | 1.87528485855925  | -1.13969342475653 | N                                                                       | 0.01646247417678  | -1.58592224999171 |
| 1.02344567239229                                          |                     |                   | 0.80358309791266                                           |                   |                   | 0.89373437355813                                                        |                   |                   |
| H                                                         | 2.18331899032538    | -1.75744906541819 | H                                                          | 2.63650492534253  | -0.84869498524101 | H                                                                       | 1.68971120870533  | -1.08447644258186 |
| 0.88629277415234                                          |                     |                   | 1.33498074665712                                           |                   |                   | 0.59086250003938                                                        |                   |                   |
| H                                                         | 0.90558643810501    | -3.32963856256439 | H                                                          | 1.19011999695609  | -2.25120319562546 | H                                                                       | 1.09061109315911  | -3.01978437925855 |
| 0.86323586078577                                          |                     |                   | 1.11988736557730                                           |                   |                   | 0.57092239841860                                                        |                   |                   |
| H                                                         | 1.10087813560022    | -1.07544998540478 | H                                                          | 0.56815563848040  | 0.38891158646307  | H                                                                       | 1.85476940905151  | 0.81187245722791  |
| 1.35674157184943                                          |                     |                   | 1.58311457552563                                           |                   |                   | 2.92647131209845                                                        |                   |                   |
| H                                                         | 1.62488982651624    | -2.62421572413340 | H                                                          | 2.83270699754095  | -0.97135760170923 | H                                                                       | 0.72147721480060  | -1.34978556074013 |
| 1.49981066964694                                          |                     |                   | 1.08219371490947                                           |                   |                   | 1.58848093224413                                                        |                   |                   |
| H                                                         | 0.01905738657255    | -2.29634404797524 | H                                                          | 1.54148565654742  | -1.93788083128647 | H                                                                       | -0.41488708302660 | -2.44019711608998 |
| 1.34632461587986                                          |                     |                   | 1.32768021977848                                           |                   |                   | 1.24525703793069                                                        |                   |                   |
| H                                                         | -0.41757243547574   | 0.71491413564573  | H                                                          | 0.10573093295074  | 0.94800854425153  | H                                                                       | 1.23351096842995  | 0.99093586508606  |
| 0.75907621668372                                          |                     |                   | 1.85041175125671                                           |                   |                   | 2.55996998978200                                                        |                   |                   |
| H                                                         | -1.47267349918011   | -0.51662152655766 | H                                                          | -2.05714121760914 | 1.41641296341921  | H                                                                       | -1.49213942052244 | -0.18211820439285 |
| 1.95055380606411                                          |                     |                   | 1.91771864565424                                           |                   |                   | 1.95457680356297                                                        |                   |                   |
| H                                                         | -2.20666011758149   | 1.29044227696042  | H                                                          | -0.80801023596524 | 2.65751007997451  | H                                                                       | -0.53337765225509 | 0.56198327914812  |
| 1.44479472218780                                          |                     |                   | 0.78319169276753                                           |                   |                   | 0.33917382607667                                                        |                   |                   |

6. Decomposition of  $\text{NH}_3\text{BH}_3$  via intermolecular H-H coupling in THF:  
 $\Delta\Delta G^* = 234 \text{ kJ mol}^{-1}$  (56 kcal mol<sup>-1</sup>)

| Substrates: $\text{NH}_3\text{BH}_3\text{-NH}_3\text{BH}_3$ |                     |                  | Transition state; $\nu_{\text{im}} = -398 \text{ cm}^{-1}$ |                   |                   | Product: $\text{B}_2\text{N}_2\text{H}_{10} + \text{H}_2$ |                  |                   |                   |                  |
|-------------------------------------------------------------|---------------------|------------------|------------------------------------------------------------|-------------------|-------------------|-----------------------------------------------------------|------------------|-------------------|-------------------|------------------|
| <b>E</b>                                                    | <b>-166,3762763</b> |                  | <b>-166,2993303</b>                                        |                   |                   | <b>-166.40021646</b>                                      |                  |                   |                   |                  |
| <b>H</b>                                                    | <b>-166,2248895</b> |                  | <b>-166,1591102</b>                                        |                   |                   | <b>-166.2557570</b>                                       |                  |                   |                   |                  |
| <b>G</b>                                                    | <b>-166,2652426</b> |                  | <b>-166,2001</b>                                           |                   |                   | <b>-166.29789097</b>                                      |                  |                   |                   |                  |
| <b>E</b>                                                    | <b>-166,6379647</b> |                  | <b>-166,5376871</b>                                        |                   |                   | <b>-166.64088737</b>                                      |                  |                   |                   |                  |
| B                                                           | -2.38802484572491   | 2.91204211672677 | B                                                          | 1.17802562560649  | 0.24807060287034  | -                                                         | B                | -3.42137861966307 | 2.93167561462684  |                  |
| 0.95553559629116                                            |                     |                  | 1.30111656047350                                           |                   |                   |                                                           | 1.29084413951406 |                   |                   |                  |
| N                                                           | -3.59460107020342   | 1.93839093891025 | N                                                          | 0.35252917973386  | -1.01857255796370 | -                                                         | N                | -4.19200561125328 | 1.70166452483815  |                  |
| 0.47577935726196                                            |                     |                  | 1.12348832007337                                           |                   |                   |                                                           | 0.59083253048053 |                   |                   |                  |
| H                                                           | -1.45246917778288   | 2.75513917252628 | H                                                          | 2.27450643126923  | 0.10208199995796  | -                                                         | H                | -2.25332901894857 | 2.61482981877786  |                  |
| 0.19701513936704                                            |                     |                  | 1.73023537420129                                           |                   |                   |                                                           | 1.39324432606630 |                   |                   |                  |
| H                                                           | -2.09842828934953   | 2.58578716202429 | H                                                          | 2.56580191086223  | 0.28456456579400  |                                                           | H                | -1.27490449489458 | 4.91424880903867  |                  |
| 2.09496590784631                                            |                     |                  | 0.51581958427068                                           |                   |                   |                                                           | 2.89557228167457 |                   |                   |                  |
| H                                                           | -2.81265684261429   | 4.05505155217783 | H                                                          | 0.60562257623616  | 1.28094725757088  | -                                                         | H                | -3.59073751003527 | 3.90470592005182  |                  |
| 0.90788091263165                                            |                     |                  | 1.25906457998112                                           |                   |                   |                                                           | 0.58818238373643 |                   |                   |                  |
| H                                                           | -4.40942254583189   | 2.02860674154634 | H                                                          | -0.43140303861209 | -0.91218596489681 | -                                                         | H                | -5.19382711846080 | 1.88409759386304  |                  |
| 1.08823878930229                                            |                     |                  | 0.42752163615396                                           |                   |                   |                                                           | 0.51739730243204 |                   |                   |                  |
| H                                                           | -3.90956332488206   | 2.14846201933829 | -                                                          | H                 | -0.10431651149796 | -1.24745258361255                                         | -                | H                 | -3.83733468608333 | 1.54077432457612 |
| 0.46905010942889                                            |                     |                  | 2.01404823641472                                           |                   |                   |                                                           | 0.34995639728083 |                   |                   |                  |
| H                                                           | -3.32587025519320   | 0.95672283876557 | H                                                          | 0.90382536514622  | -1.84239090428124 | -                                                         | H                | -4.09340744473607 | 0.82261541239944  |                  |
| 0.48383429107018                                            |                     |                  | 0.87706687914468                                           |                   |                   |                                                           | 1.09770543299171 |                   |                   |                  |
| H                                                           | -3.62717797010433   | 3.89629075839835 | H                                                          | 1.85514833259062  | 0.39251112931152  |                                                           | H                | -0.88099751526103 | 4.87072093951393  |                  |
| 2.87591054037878                                            |                     |                  | 0.76161528516905                                           |                   |                   |                                                           | 3.52382414568928 |                   |                   |                  |
| H                                                           | -4.12754750310937   | 3.78055059674458 | H                                                          | -0.23641515850994 | 0.33445073650433  |                                                           | H                | -3.71272556542333 | 2.52931185523065  |                  |
| 4.43348089074959                                            |                     |                  | 2.26677275896971                                           |                   |                   |                                                           | 3.39378077751019 |                   |                   |                  |
| N                                                           | -4.44203288198516   | 3.98850855025422 | N                                                          | -0.40446822735139 | 0.66296011652211  |                                                           | N                | -4.08940885638064 | 3.17194519088480  |                  |
| 3.48802707862085                                            |                     |                  | 1.32004421685270                                           |                   |                   |                                                           | 2.69836332303267 |                   |                   |                  |
| H                                                           | -4.71021533324017   | 4.97030642737220 | H                                                          | -0.38325261470850 | 1.67613943252819  |                                                           | H                | -3.78858894768645 | 4.08963732705960  |                  |
| 3.47766707344280                                            |                     |                  | 1.38248041823231                                           |                   |                   |                                                           | 3.02108422013436 |                   |                   |                  |
| H                                                           | -5.22385536548494   | 1.87138863528488 | H                                                          | -1.67375565259136 | -1.08951646247121 |                                                           | H                | -6.05373233756791 | 1.95451820506417  |                  |
| 3.05899105321156                                            |                     |                  | 0.57562924827017                                           |                   |                   |                                                           | 2.63370464052930 |                   |                   |                  |
| B                                                           | -5.64871137004771   | 3.01425581314372 | B                                                          | -1.76287244032122 | 0.14662480989853  |                                                           | B                | -5.70487343612638 | 3.12072869804726  |                  |
| 3.00986425492581                                            |                     |                  | 0.75885676086020                                           |                   |                   |                                                           | 2.75544311693162 |                   |                   |                  |
| H                                                           | -5.93846317948459   | 3.33891220829129 | H                                                          | -1.98746499931990 | 0.67684801971950  | -                                                         | H                | -6.13412063411801 | 3.79951589798047  |                  |
| 1.87002116122901                                            |                     |                  | 0.33406842635950                                           |                   |                   |                                                           | 1.83293283487361 |                   |                   |                  |
| H                                                           | -6.58426543836136   | 3.17210906069501 | H                                                          | -2.75151077853243 | 0.30491980254814  |                                                           | H                | -6.07193359655973 | 3.56153446034606  |                  |
| 3.76819322379979                                            |                     |                  | 1.48539174017732                                           |                   |                   |                                                           | 3.83340010218345 |                   |                   |                  |
